# Supplementary material for: The Dual Molecular Identity of Vestibular Kinocilia: Bridging Structural and Functional Traits of Primary and Motile Cilia
Source: bioRxiv preprint, doi:10.1101/2025.04.16.647417, version 4 (2025-12-11)
Supplement: Supplemental Table 1 [file 647417_file03.xlsx]

## Sheet: Readme
PROTOCOLS
GEO Sample record	GSE283534
Cell isolation protocol	Cochlear and vestibular sensory epiethelia were isolated from the 10 week-old mouse (CBA/J) inner ear. Solitory cells were obtained by emzymatic digestion and mechanical trituration in L-15 medium
library construction protocol	Single-cell capture and library preparation were performed using droplet-based microfluidic technology, following the manufacturer’s instructions for the Chromium Next GEM Single Cell 3ʹ v3.1 dual index kit. The quality of the obtained libraries was assessed via high-sensitivity DNA kits (Agilent Technologies) using Agilent 2100 Bioanalyzer prior to sequencing with Illumina NovaSeq 6000.
data processing step	Standard 10x Genomics CellRanger pipeline (version 6.1.2) was used for demultiplexing, alignment (10x reference genome mm10), barcode processing, and UMI counting to obtain the filtered count matrices. Processing and visualization of the scRNA-seq data from cochlear and vestibular were performed in R. Ten filtered count matrices obtained from 5 biological replicates of cochlear and vestibular sam…
genome build/assembly	Mouse mm10
processed data files format and content	Filtered barcode, matrix and features(genes) files
Pseudobulk analysis:	Adult IHCs, OHCs, type I and type II hair cells were used to extract raw count data from single cells and aggregated them by averaging counts across the biological replicates to generate a pseudobulk data frame that contains summed expression values for the four HC types. Expression values were then scaled and log2-normalized.

## Sheet: HC Genes
Gene	IHCs	OHCs	Type I	Type II
0610005C13Rik	0.0160573	0.116244	0.0162098	0.0105049
0610009B22Rik	0.650142	0.713424	0.547989	0.521395
0610009E02Rik	0.0108786	0.0269911	0.093622	0.039629
0610009L18Rik	0.266963	0.22	0.472911	0.745975
0610010F05Rik	0.0753946	0.0879203	0.143138	0.138021
0610010K14Rik	0.367571	0.331929	0.347084	0.344079
0610012G03Rik	0.745624	0.785953	0.76914	0.708712
0610025J13Rik	0	0	0	0
0610030E20Rik	0.393982	0.279063	0.272055	0.294744
0610033M10Rik	0.16218	0.384053	0.0354398	0
0610038B21Rik	0.0289584	0.0143929	0	0
0610039K10Rik	0.0148168	0	0	0
0610040B10Rik	0.127526	0.205705	0.17091	0.130218
0610040J01Rik	0	0	0	0.0109035
0610043K17Rik	0.0486669	0.0628878	0.132468	0.184091
1010001B22Rik	0.107189	0.120622	0.156061	0.138582
1110002L01Rik	0.0475525	0.131015	0.120881	0.108684
1110004F10Rik	1.11416	0.904429	1.31933	1.29031
1110006O24Rik	0.0346927	0.0466758	0.035441	0.0410695
1110008P14Rik	1.51852	1.31551	0.966664	0.999822
1110012L19Rik	0.451183	0.154324	0.236432	0.211256
1110013H19Rik	0	0.0222607	0.00354487	0
1110017D15Rik	0.0108834	0.0117355	2.63981	2.21154
1110018N20Rik	0	0	0.0997041	0.0983292
1110019B22Rik	0	0	0.0311567	0.02528
1110019D14Rik	0.10063	0.0323418	0.0205694	0.0674408
1110020A21Rik	0.0609846	0.0939565	0.107736	0.148603
1110032A03Rik	0.593378	0.565129	1.20765	1.06522
1110032F04Rik	0	0.0076551	0	0
1110035H17Rik	0.0122127	0.0978624	0.0653893	0.0669152
1110038B12Rik	0.142589	0.132073	0.0767165	0.102584
1110038F14Rik	0.396354	0.466132	0.511329	0.599185
1110046J04Rik	0.0425807	0.0724933	0.0907177	0.145085
1110051M20Rik	0.143223	0.165759	0.338449	0.239252
1110059E24Rik	0.234733	0.152906	0.25281	0.553297
1110059G10Rik	0.330141	0.225747	0.319465	0.244237
1110065P20Rik	0.650709	0.535073	0.619635	0.680171
1190005I06Rik	0.139486	0.20944	0.164026	0.190887
1190007I07Rik	0.019406	0.077364	0.130771	0.160165
1200007C13Rik	0	0	0	0
1300002E11Rik	0.817943	0.668735	0.77315	0.508163
1300014J16Rik	0.046925	0.00568643	0.0396696	0.0164627
1300017J02Rik	0	0.0119186	0	0
1500002C15Rik	0.014153	0.023395	0.0130572	0
1500002F19Rik	0.0552081	0.0100857	0.0132594	0
1500004A13Rik	0.0463553	0.0237045	0.0969508	0.0756201
1500009C09Rik	0	0	0	0
1500009L16Rik	0	0	0.0261269	0.0133986
1500011B03Rik	0.557111	0.453448	0.816817	0.806648
1500015A07Rik	0.200425	0.437078	0.438143	0.447908
1500015L24Rik	0	0	0	0
1500026H17Rik	0.1568	0.0445073	0.340407	0.395447
1500032F14Rik	0	0	0.0593296	0.0561613
1600002K03Rik	0.12031	0.172737	0.115118	0.0905308
1600010M07Rik	0	0	0	0
1600012H06Rik	0.215042	0.2289	0.0950409	0.126509
1600014C10Rik	0.149382	0.0400089	0.0231562	0.0092258
1600014C23Rik	0	0	0.0441206	0.0196513
1600020E01Rik	0.215469	0.26119	0.321918	0.194453
1600022D10Rik	0.0510519	1.32805	0.231067	0.0659554
1700001C02Rik	0	0	1.31739	1.19465
1700001G11Rik	0	0	0	0
1700001K23Rik	0.983614	1.24791	0.015621	0.0259998
1700001L05Rik	0	0	0	0
1700001L19Rik	0.0756267	0.0130682	0.747503	0.904867
1700001O22Rik	0	0.00704121	0.00489167	0
1700003E16Rik	0.0620788	0.0122098	0.174179	0.250597
1700003F12Rik	0	0.00343004	0	0
1700003G18Rik	0	0.00642354	0.00949108	0.0126792
1700006J14Rik	0	0	0	0.0216497
1700007K13Rik	0	0	0.81794	0.840547
1700007L15Rik	0	0.0836799	0.123596	0.0607545
1700008J07Rik	0.207931	0.0904069	0.182818	0.179934
1700008O03Rik	0.0358277	0.00707839	0.00578919	0.0403778
1700010I14Rik	0.0215287	0.0129942	0.0865673	0.0787157
1700010K24Rik	0	0.00384261	0	0
1700012B09Rik	0	0	0.00422999	0
1700012C14Rik	0	0	0	0
1700012D14Rik	0.0540289	0.128097	0.17124	0.220826
1700012P22Rik	0	0	1.05904	0.802217
1700013F07Rik	0	0	0.302588	0.0969493
1700015F17Rik	0	0	0.0762352	0.136049
1700016C15Rik	0	0	0.0583797	0
1700016J18Rik	0	0	0.192064	0.182996
1700016K19Rik	0.0559808	0.0171463	1.42842	1.25459
1700017B05Rik	0	0.017296	0.0237908	0
1700017M07Rik	0	0	0	0.0117991
1700018A04Rik	0	0	0	0
1700018L02Rik	0	0	0.00354487	0
1700019D03Rik	0.0781238	0	0.0509923	0.236568
1700019L13Rik	0.0546792	0.00204941	0	0
1700020D05Rik	0	0.00374206	0	0
1700020L24Rik	0.0230863	0.048264	0.00484715	0
1700020N18Rik	0	0	0.00403851	0.0338262
1700021F05Rik	0.366941	0.403609	0.451914	0.304745
1700021N21Rik	0	0	0	0
1700022N22Rik	0	0	0	0
1700023F06Rik	0.172404	0.00747083	0.0271917	0.0392148
1700023H06Rik	0	0.00247588	0.0114114	0.0132483
1700024G13Rik	0	0	1.61799	1.28081
1700025G04Rik	0.10053	0.693065	0.674636	0.384732
1700027J07Rik	0	0	0.00353845	0
1700028E10Rik	0.0204178	0.011129	0.0650654	0.012489
1700028J19Rik	0	0	0	0
1700028K03Rik	0	0	0	0
1700028N14Rik	0	0	0	0
1700028P14Rik	0	0	0.621724	0.599289
1700029I15Rik	0.0663653	0.0142707	0	0
1700029J07Rik	0.103385	0.035182	0.397758	0.592986
1700030J22Rik	0.0369486	0.0581071	0.554642	0.41895
1700030K09Rik	0.0734049	0.048616	0.103573	0.121602
1700034H15Rik	0	0	0.0470842	0.0234014
1700034P13Rik	0	0	0	0
1700037C18Rik	0.0826196	0.0472351	0.206212	0.199431
1700037H04Rik	0.151566	0.112331	0.0520797	0.100599
1700040D17Rik	0.0429566	0	0.0464965	0.00959951
1700041G16Rik	0.0467916	0.028987	0.0710513	0.0407397
1700044C05Rik	0	0	0	0
1700047K16Rik	0	0	0	0
1700047M11Rik	0	0	0.00598434	0
1700048O20Rik	0	0.0116676	0.0223238	0.0319058
1700052K11Rik	0.174666	0.146937	0.15328	0.0872287
1700055D18Rik	0	0.0040499	0.0174301	0.0126298
1700056E22Rik	0.0105861	0.0524747	0.0708363	0.035373
1700056N10Rik	0	0.00198677	0.00495651	0
1700061G19Rik	0	0	0	0
1700063J08Rik	0.0393017	0.116008	0.00519841	0.0551322
1700066B17Rik	0	0	0.158093	0.0613736
1700066B19Rik	0	0.00478871	0.00474635	0
1700066M21Rik	0	0.04949	0.019314	0.0150893
1700067G17Rik	0	0	0	0
1700081N11Rik	0.0449605	0.0144825	0.0348608	0.0221771
1700084C06Rik	0	0	0.0300668	0
1700084E18Rik	0.079459	0.0549043	0.0138732	0.0326103
1700086O06Rik	0.145045	0.0889475	0.0669976	0.148777
1700086P04Rik	0.0107143	0.0656762	0.0302613	0.05068
1700088E04Rik	0.0636864	0.0409541	0.545774	0.49637
1700094D03Rik	0.157909	0.0163011	1.65307	1.75249
1700095J03Rik	0	0	0.0263093	0.0217893
1700096K18Rik	0.39036	0.42611	0.381207	0.358645
1700097N02Rik	0	0	0.00484848	0
1700101I11Rik	0	0.0241129	0.00832851	0.0243477
1700102H20Rik	0.01305	0.0125838	0.0132354	0
1700102P08Rik	0	0	0	0
1700105P06Rik	0.062095	0.0432363	0.0963265	0.123708
1700109H08Rik	0.0196439	0.0213151	0.0211989	0
1700112J16Rik	0.0241814	0.0203689	0.0176431	0.037513
1700113A16Rik	0.0553927	0.0787085	0.143988	0.153199
1700120B22Rik	0	0.00795081	0	0
1700120C14Rik	0.0160573	0.0914934	0.116891	0.0818167
1700122E12Rik	0	0	0	0
1700123M08Rik	0.0155171	0.00993202	0.0263391	0.0274259
1700123O20Rik	0.416525	0.337736	0.289878	0.339837
1700124L16Rik	0	0	0.00405341	0
1700125G22Rik	0.039235	0	0.0270101	0.0244623
1810008B01Rik	0	0.00272233	0	0
1810008I18Rik	0	0	0.0472146	0.600101
1810009A15Rik	0.111745	0.10573	0.145568	0.206934
1810010H24Rik	0.0240299	0.0312602	0.0272099	0
1810012K16Rik	0	0	0	0
1810013L24Rik	0.29115	0.309649	0.286448	0.332863
1810019D21Rik	0	0	0.00483648	0
1810019N24Rik	0	0	0.0126581	0.0386725
1810020O05Rik	0	0	0.0517015	0.0496826
1810021B22Rik	0.0423575	0.0201671	0.0682847	0.0418415
1810024B03Rik	0.0598654	0.14947	0.117218	0.1371
1810026B05Rik	0.729091	0.593569	0.943971	0.801127
1810028F09Rik	0	0	0	0
1810030O07Rik	0.153577	0.360678	0.312782	0.241877
1810034E14Rik	0.0488459	0.00371153	0	0
1810037I17Rik	1.39057	1.79356	3.09336	1.99522
1810041H14Rik	0.0987211	0.0310848	0.0238126	0.0256403
1810044D09Rik	0.129318	0.189529	0.265898	0.230246
1810046K07Rik	0	0	0.0603348	0
1810049I09Rik	0	0	0	0
1810053B23Rik	0	0	0	0
1810055G02Rik	0.0370106	0.0233943	0.0542622	0.0747328
1810058I24Rik	1.24327	0.66514	0.455168	0.608276
1810059C17Rik	0	0.0079037	0	0
1810059H22Rik	0	0	0.00788212	0.0523283
1810062G17Rik	0	0	0	0.0506197
1810062O18Rik	0	0.0250115	0.0132373	0.0115885
1810064F22Rik	0	0	0	0
2010001A14Rik	0.0234996	0.0778711	0.137866	0.128358
2010001K21Rik	0.010268	0	0	0
2010007H06Rik	0.0162376	0	0.250665	0.507576
2010016I18Rik	0	0	0	0
2010106G04Rik	0	0.0126611	0.0203575	0.00902199
2010109A12Rik	0.0520524	0.117135	0.0589318	0.0814286
2010110K18Rik	0	0	0	0
2010204K13Rik	0.01305	0	0.806484	0.469375
2010300C02Rik	0.784848	0.662113	1.56399	1.28515
2010308F09Rik	0	0	0.0218164	0.0761879
2010309G21Rik	0	0	0	0
2010315B03Rik	0.0957703	0.161178	0.0874397	0.130107
2010320M18Rik	0.415296	0.438954	0.717009	0.829768
2200002D01Rik	0.00910097	0.0179033	0.0554254	0.0258775
2210011C24Rik	1.44667	1.77779	0.601993	0.447553
2210016F16Rik	0.25507	0.180788	0.100914	0.154727
2210016L21Rik	0.597065	0.440774	0.972483	0.785412
2210017I01Rik	0	0	0.180999	0.397587
2210039B01Rik	0.0405761	0.0286284	0.00470316	0.0120598
2210406O10Rik	0.0137017	0	0.00567882	0.0119335
2210408F21Rik	0.165088	0.442307	0.43463	0.337696
2210408I21Rik	0.171586	0.139286	0.467087	0.330465
2300009A05Rik	0.82993	0.502519	1.971	1.34414
2310001H17Rik	0.0594328	0.0186596	0.0555533	0.213252
2310002F09Rik	0.0347156	0	0	0
2310008N11Rik	0	0	0	0
2310009A05Rik	0.619746	0.562661	0.485268	0.406586
2310009B15Rik	0.838538	0.574258	0.898501	0.786562
2310010J17Rik	0.27052	0.129446	0.624022	0.676174
2310011J03Rik	0.337852	0.289593	0.185662	0.217702
2310014F06Rik	0	0	0.00844217	0.0147835
2310015A10Rik	0.0996905	0.0495462	0.116307	0.0654181
2310022A10Rik	0.137425	0.140421	0.0961467	0.126389
2310022B05Rik	0.0369514	0.014182	0.035721	0.0756797
2310030G06Rik	0.18978	0.0670579	0.192337	0.350519
2310033P09Rik	0.51822	0.307906	0.446931	0.481027
2310034G01Rik	0.163817	0.16534	0.240013	0.321438
2310039H08Rik	0.481152	0.321051	0.424699	0.309125
2310040G24Rik	0.900866	0.310311	0.336127	0.712001
2310047D07Rik	0	0	0	0
2310057M21Rik	0.279009	0.282176	0.241167	0.300589
2310058D17Rik	0	0.0267881	0.00432365	0
2310061I04Rik	0.223909	0.296738	0.196067	0.197152
2310068J16Rik	0.01112	0.00761218	0.0892288	0.0403626
2310074N15Rik	0.0429566	0.00888503	0	0
2310075C17Rik	0	0	0	0
2410002F23Rik	0.0974105	0.108707	0.0957629	0.183531
2410004B18Rik	0.268299	0.372461	0.271359	0.287529
2410004I01Rik	0	0	0	0
2410004P03Rik	0	0	1.08747	0.925842
2410006H16Rik	0.431445	0.237847	0.351822	0.463989
2410018L13Rik	0	0.00291752	0	0
2410022M11Rik	0.219986	0.083378	0.214582	0.142131
2410080I02Rik	0.0319759	0.00567997	0.0249129	0.0203121
2410131K14Rik	0.074839	0.0715509	0.104343	0.0617743
2500002B13Rik	0.073149	0.128076	0.0167655	0.0326597
2500004C02Rik	0.0228018	0.0356092	0.063025	0.0558383
2510002D24Rik	1.11528	0.912215	0.0991056	0.544261
2510009E07Rik	0.150646	0.352494	0.547204	0.326522
2510017J16Rik	0.0173465	0.0236873	0.0245882	0.0232966
2510039O18Rik	0.365551	0.549154	0.292872	0.337383
2510046G10Rik	0.177402	0.0876275	0.20473	0.378089
2600002D14Rik	0	0	0	0
2600006K01Rik	0	0	0.0109243	0
2610001J05Rik	0.268104	0.154729	0.19628	0.255161
2610002M06Rik	0.428509	0.302009	0.353845	0.418627
2610008E11Rik	0.246931	0.209623	0.267004	0.339959
2610020C07Rik	0	0.0265219	0.0763454	0.0378402
2610021A01Rik	0.0824893	0.107971	0.0896065	0.0872682
2610027K06Rik	0.375205	0.00400774	0.0360324	0.0232966
2610035D17Rik	0.0334208	0.0556798	0.0354127	0.0128447
2610035F20Rik	0	0	0.00929789	0
2610037D02Rik	0.0933215	0.0896319	0.122425	0.0791094
2610044O15Rik8	0.258692	0.20747	0.184164	0.179712
2610203C22Rik	0	0	0.00930646	0
2610301B20Rik	0.327912	0.332593	0.712643	0.688316
2610306M01Rik	0.090754	0.169964	0.190799	0.177398
2610307P16Rik	0.0217964	0.076361	0.127202	0.17424
2610318N02Rik	0	0.0285213	0	0.0152309
2610507B11Rik	0.399189	0.29847	0.307979	0.310819
2610507I01Rik	0.243255	0.144506	0	0.0231221
2610528J11Rik	0.091703	0.00888448	0.00372441	0.0394289
2700033N17Rik	0	0	0.565281	0.373321
2700038G22Rik	0	0.00500417	0	0
2700046A07Rik	0	0	0	0.0347694
2700046G09Rik	0.166609	0.0998107	0.339152	0.254142
2700049A03Rik	0.193002	0.326586	0.13627	0.201833
2700054A10Rik	0.0353856	0.0162547	0.014684	0.0386592
2700062C07Rik	0.181318	0.24416	0.283949	0.184814
2700069I18Rik	0	0	0	0
2700081O15Rik	0.0761157	0.0613803	0.0133705	0.0522745
2700097O09Rik	0.152897	0.100536	0.094656	0.1366
2810001G20Rik	0.111782	0.189362	0.262135	0.432065
2810002D19Rik	0.0941474	0.69858	0.0892671	0.0837253
2810004N23Rik	0.333334	0.395929	0.562306	0.393076
2810006K23Rik	0.0898436	0.0801984	0.157337	0.267096
2810013P06Rik	0.52995	0.634157	0.445705	0.546802
2810021J22Rik	0.0412063	0.0608239	0.0671362	0.0845657
2810029C07Rik	0.0484699	0.0431296	0.0580007	0.0441845
2810030D12Rik	0.0526621	0.00854707	0.00490532	0.026302
2810032G03Rik	0.0859757	0.00876279	0.00451353	0
2810402E24Rik	0.0506533	0.303335	0.273431	0.24936
2810403D21Rik	0.11254	0.0947338	0.0991546	0.228613
2810405F17Rik	0	0.0899088	0.054493	0.101897
2810408A11Rik	0	0.00371153	0	0
2810408I11Rik	0	0.00421356	0.00950411	0
2810410L24Rik	0.0488459	0.0216583	0.0439941	0.0353406
2810414N06Rik	0.0194663	0.00537114	0.00460217	0
2810429I04Rik	0	0	0	0
2810433D01Rik	0	0	0	0
2810442N19Rik	0	0	0	0.0123535
2810454H06Rik	0.102112	0.191445	0.169761	0.2405
2810455O05Rik	0.046925	0.0097012	0	0
2810457G06Rik	0	0	0	0
2810459M11Rik	0	0	0.00415106	0
2810468N07Rik	0	0	0	0.0147835
2900005J15Rik	0	0	0	0
2900009J06Rik	0.0204178	0.0164732	0.00388581	0.00902199
2900026A02Rik	0.312656	0.569609	0.455312	0.264021
2900040C04Rik	0.0346748	0	0	0
2900041M22Rik	0	0	0	0
2900042K21Rik	0	0	0	0
2900045O20Rik	0.0335337	0.015208	0	0
2900052L18Rik	0.295361	0.128048	0.17359	0.330722
2900052N01Rik	0	0	0	0
2900060B14Rik	0.020126	0.0549179	0.114795	0.144812
2900060N12Rik	0	0.0333156	0.0043775	0.00772997
2900076A07Rik	0.357441	0.301349	0.341184	0.4141
2900079G21Rik	0	0	0	0
2900089D17Rik	0	0	0	0
2900093K20Rik	0.110794	0.382937	0.237639	0.298528
2900097C17Rik	0.530593	0.372524	0.371315	0.407438
3010001F23Rik	0	0	0.0290528	0.0402806
3010003L21Rik	0.0420529	0.0277765	0.0220686	0.0611473
3110001I22Rik	0.0204178	0.0227394	0.0187761	0
3110006O06Rik	0	0.0341278	0	0
3110009E18Rik	0.0914991	0.0842257	0.0937392	0.193675
3110021N24Rik	0.216033	0.123124	0.14883	0.254147
3110039M20Rik	0.05204	0.0214747	0	0
3110040N11Rik	0.130525	0.221167	0.250525	0.144935
3110045C21Rik	0.180471	0.361016	0.254151	0.358135
3110056K07Rik	0.126053	0.386449	0.275512	0.220293
3110070M22Rik	0	0.017966	0.0139941	0.0133053
3110082I17Rik	0.103821	0.0322766	0.232993	0.247695
3110083C13Rik	0	0	0.0115519	0
3222401L13Rik	0.295578	0.114466	0.337039	0.351709
3300002I08Rik	0.0239038	0	0.0113845	0
3300002P13Rik	0	0	0	0
3300005D01Rik	0	0	0	0
3425401B19Rik	0	0	0	0
3830403N18Rik	0	0	0	0
3830406C13Rik	0.830238	1.15355	1.06879	0.916815
3830408C21Rik	0.0517677	0.0282664	0.00534546	0.036991
4430402I18Rik	0	0.0320346	0.585608	0.553031
4631405J19Rik	0.0570221	0	0	0.0146733
4632404H12Rik	0.0708807	0.0991134	0.141753	0.183685
4632411P08Rik	0	0.0111917	0	0
4632427E13Rik	0.621083	0.772512	0.905626	0.682804
4732414G09Rik	0.11835	0.0326731	0.0574976	0
4732419C18Rik	0	0.00423137	0	0
4732440D04Rik	0.172286	0.263881	0.285497	0.239106
4732465J04Rik	0	0	0	0
4732471J01Rik	0	0	0.011201	0.0110633
4732490B19Rik	0	0	0	0
4732491K20Rik	0.0588707	0.0482897	0.0186059	0.0422965
4732496C06Rik	0	0	0.00872134	0
4831440D22Rik	0	0	0	0.0266527
4833403J16Rik	0	0	0	0
4833407H14Rik	0	0	0	0
4833408A19Rik	0	0.0383834	0	0.0499471
4833411C07Rik	0	0	0	0
4833413G10Rik	0.0387692	0.0308939	0.0351419	0.0664299
4833417C18Rik	0.132915	0.00823953	0.0697158	0.0236619
4833418N02Rik	0.0800063	0.0607765	0.0600434	0.031592
4833419F23Rik	0	0	0	0
4833420G17Rik	0.308117	0.462037	0.351394	0.436944
4833422C13Rik	0	0	0	0
4833422M21Rik	0	0	0.00583338	0
4833427G06Rik	0	0	0.00989136	0
4833428L15Rik	0.0321358	0.00261335	0	0
4833438C02Rik	0.0208562	0.0787955	0.0258791	0.0229366
4833439L19Rik	1.12602	1.51379	1.2243	1.18899
4833445I07Rik	0.0102429	0.0260965	0.0227716	0.0147835
4921504A21Rik	0	0.00731192	0.0503349	0.0763465
4921507G05Rik	0.010268	0.0170028	0	0
4921507P07Rik	0	0	0	0
4921511C10Rik	0	0	0	0
4921516A02Rik	0	0.00774712	0	0
4921524J17Rik	0.209436	0.25405	0.312732	0.37606
4921525O09Rik	0	0	0	0
4921531C22Rik	0.120902	0.125247	0.14027	0.220594
4930402H24Rik	0.509545	0.46711	0.181013	0.214537
4930403P22Rik	0.0488459	0.00760833	0	0
4930404N11Rik	0	0.00856291	0	0.109499
4930405A21Rik	0.130194	0.0372382	0.0175802	0.094722
4930412C18Rik	0.108119	0.0279831	0.14785	0.146701
4930412O13Rik	0.0229901	0.0142743	0	0
4930413F20Rik	0	0	0	0.0165171
4930415O20Rik	0	0	0	0
4930425O10Rik	0	0	0	0
4930425P05Rik	0	0	0	0
4930426D05Rik	0.147556	0.0761755	0.060895	0.0234907
4930426I24Rik	0.273123	0.942575	0.0862081	0.195033
4930426L09Rik	0	0.00696429	0	0
4930430F08Rik	0.469634	0.498541	0.662373	0.69413
4930431P03Rik	0.0470667	0	0	0
4930432B10Rik	0.00910097	0.00748693	0	0
4930432K21Rik	0.0103046	0.0213131	0	0
4930434B07Rik	0	0	0.0232784	0.0228943
4930438A08Rik	0	0	0	0
4930444P10Rik	0	0	0.448254	0.438301
4930447C04Rik	0	0	0	0
4930447N08Rik	0	0	0	0
4930448E22Rik	0	0	0	0
4930452B06Rik	0	0.0203441	0.0173772	0.0563368
4930452G13Rik	0.0322641	0	0	0
4930453N24Rik	0.396555	0.430986	0.5422	0.593924
4930455G09Rik	0.0302396	0	0.0110422	0
4930458D05Rik	0	0	0	0
4930470G03Rik	0	0	0.0203688	0.0115288
4930481A15Rik	0.0334175	0.10248	0.128072	0.179576
4930481B07Rik	0.0292468	0.0250023	0.0140371	0.0155892
4930486L24Rik	0	0	0	0
4930500F10Rik	0	0	0.0216234	0
4930500H12Rik	0	0.00868675	0	0
4930502E09Rik	0	0	0	0
4930503L19Rik	0.0612516	0.0198582	0.0447368	0.0224158
4930506C21Rik	0	0	0	0
4930509H03Rik	0.032758	0.115087	0.0830374	0.136129
4930511M06Rik	0.0159618	0	0	0
4930512H18Rik	0	0	0.0103507	0.118737
4930513D17Rik	0	0	0	0
4930513N10Rik	0	0	0	0
4930515G01Rik	0	0.0258081	0.00507092	0.0375283
4930517E14Rik	0	0	0.00933943	0
4930519A11Rik	0	0	0.0189327	0.0243172
4930519L02Rik	0	0	0	0
4930520O04Rik	0	0	0	0
4930522L14Rik	0.0233337	0.0531968	0.0347669	0.025012
4930523C07Rik	0.199375	0.0342073	0.032603	0.0647478
4930524O07Rik	0	0.00204606	0.00272147	0.0256255
4930525G20Rik	0	0	0.00489167	0.0133053
4930528D03Rik	0	0	0	0
4930532G15Rik	0	0.0230617	0.00578919	0.0675019
4930534H18Rik	0	0.0252781	0	0
4930537H20Rik	0	0.0152389	0.00554445	0
4930539J05Rik	0.0887078	0.0346792	0.0735534	0.0539563
4930544F09Rik	0	0	0.0301138	0.0111259
4930547M16Rik	0	0	0.0455951	0.104186
4930548J01Rik	0	0	0.0253858	0.0229988
4930549G23Rik	0	0	0	0
4930550C14Rik	0	0	0	0
4930553M12Rik	0	0.00357884	0	0
4930555A03Rik	0	0	0	0
4930556M19Rik	0	0	0.0385466	0.0635875
4930558C23Rik	0.0258517	0.733213	0.426112	0.440449
4930558J18Rik	0	0	0	0
4930558N11Rik	0	0	0.103075	0.0800421
4930563E22Rik	0.0145784	0.0476288	0.052317	0.0217813
4930565N06Rik	0	0.00198677	0	0
4930570G19Rik	0	0.0300397	0.181825	0.149939
4930572G02Rik	0	0	0	0
4930578M01Rik	0.050529	0.0270836	0.0951971	0.307962
4930578M07Rik	0	0	0	0
4930579G24Rik	0.0108834	0.00584811	0.00422999	0.0225268
4930579K19Rik	0.12471	0.0834452	0.25539	0.0966718
4930581F22Rik	0.0130636	0.0674494	0.0620131	0.0972375
4930589L23Rik	0	0	0.0056243	0
4930590J08Rik	0	0.0113049	0	0
4930594M22Rik	0	0.0324063	0.0331926	0.0247812
4930594M22Rik.1	0	0	0.010451	0
4930597A21Rik	0	0	0.00353845	0
4930599N23Rik	0	0	0	0
4931406C07Rik	0.272915	0.146746	0.149992	0.263091
4931406P16Rik	0.233949	0.265799	0.208093	0.299064
4931408C20Rik	0	0	0	0
4931414P19Rik	0.0300958	0.00864297	0.00520766	0.0092258
4931415C17Rik	0.096228	0.100572	0.255437	0.490358
4931428F04Rik	0.0108786	0.0111148	0.0580385	0.0452737
4932422M17Rik	0.118118	0.0837976	0.116629	0.189482
4932438A13Rik	0.836271	1.14531	0.755258	0.885226
4932441J04Rik	0.0204183	0.0319589	0.0322094	0.0501851
4933404O12Rik	0	0.0370042	0.0336566	0.0105049
4933406C10Rik	0.0303719	0.00705048	0.0507467	0.0115268
4933406P04Rik	0.059049	0.0446139	0.00458058	0.0130381
4933407K13Rik	0.0456674	0.159691	0.0103905	0.0196483
4933408B17Rik	0.0277318	0.0399315	0.014098	0.0666334
4933412E12Rik	0	0.120475	0.17118	0.157697
4933415A04Rik	0.0212501	0	0.0505937	0.029196
4933421O10Rik	0.230345	0.266103	0.116347	0.141766
4933424G06Rik	0	0.00455483	0	0
4933424M12Rik	0.0104044	0.0594296	0	0
4933427D14Rik	0.0688721	0.0406974	0.0691226	0.0354537
4933428P19Rik	0	0.00830641	0	0
4933429H19Rik	0.0317341	0.0381721	0.0308449	0.0783863
4933431E20Rik	0.0489151	0.0499926	0.148888	0.0748803
4933431K23Rik	0	0	0	0
4933433G15Rik	0.0148431	0.0460961	0.0381537	0.0322959
4933434E20Rik	0.483016	0.363886	0.528585	0.550973
4933439C10Rik	0.0461946	0.102514	0.146678	0.233119
4933439K11Rik	0	0.00535008	0.0242802	0.0358575
4933439N14Rik	0	0	0.0462492	0.0278947
4933440M02Rik	0	0	0	0.227763
5031425E22Rik	0.528901	0.853067	0.702968	0.733301
5031425F14Rik	0	0	0	0
5031434O11Rik	0.0416707	0.0134675	0.0306123	0.0629272
5031439G07Rik	0.251617	0.123217	0.137303	0.214482
5033403F01Rik	0	0.0428347	0.043729	0.0105049
5033406O09Rik	0	0	0	0
5033417F24Rik	0.0459736	0.0346125	0.0770703	0.160546
5033430I15Rik	0.306278	0.0869496	0.430686	0.426561
5330413P13Rik	0	0	0.42007	0.360963
5330417C22Rik	0.0111945	0	0.00382492	0
5330434G04Rik	0	0	0.246068	0.266833
5330438D12Rik	0.136791	0.269408	0.162585	0.274139
5330439K02Rik	0	0.0158135	0.0186343	0.0117991
5430400D12Rik	0.0102722	0.046002	0.0612655	0.0364053
5430401H09Rik	0	0	0	0
5430402O13Rik	0.0223345	0	0.011321	0.0236876
5430403G16Rik	0.114077	0.136561	0.0875624	0.175853
5430405H02Rik	0.475167	0.35211	0.33214	0.372989
5430414B19Rik	0	0	0	0
5430416N02Rik	0.0389687	0.0985623	0.0526271	0.101197
5430419D17Rik	0	0	0.00526538	0
5430427N15Rik	0	0	0.00581601	0
5430427O19Rik	0	0	0	0
5430431A17Rik	0	0.00813162	0	0
5430440P10Rik	0	0	0	0
5530601H04Rik	0.220215	0.242679	0.402284	0.395914
5730405O15Rik	0.0102722	0.0128466	0.0120861	0
5730409E04Rik	0.825901	0.0361633	0.326578	0.261198
5730414N17Rik	0.067735	0.0108733	0.0300026	0.0139095
5730419F03Rik	0.010261	0	0	0
5730420D15Rik	0	0.0120699	0	0
5730455P16Rik	0.383231	0.296012	0.365171	0.33992
5730480H06Rik	0.361299	0.18879	0.294046	0.176976
5730507C01Rik	0.01112	0	0	0
5730522E02Rik	0	0	0.0179623	0
5830405F06Rik	0.0415015	0	0	0
5830408C22Rik	0	0.00751729	0	0
5830416I19Rik	0.0365381	0.138031	0.143294	0.0783618
5830418P13Rik	0	0.00704765	0	0
5830428M24Rik	0.166724	0.229285	0.209324	0.303403
5830432E09Rik	0	0	0	0
5830444B04Rik	0.110741	0.0250431	0	0
5830448L01Rik	0.0751129	0.297312	0.102015	0.122413
5830454E08Rik	0.113572	0.185496	0.0966139	0.0935838
5830468F06Rik	0	0	0	0
5830487J09Rik	0.0102429	0	0	0.0092258
5930403N24Rik	0	0	0	0
5930430L01Rik	0.0130636	0.0092059	0.0504448	0.100317
5930438M14Rik	0	0	0.0461924	0
6030407O03Rik	0.0814647	0.00939244	0.0572368	0.0367675
6030442K20Rik	0	0.0544864	0.0346179	0.0775823
6030443J06Rik	0.0684941	0.0374668	0.0216376	0.051526
6030458C11Rik	0.415192	0.341206	0.427507	0.541233
6030468B19Rik	0	0	0	0
6230400D17Rik	0.0102345	0.0608743	0.0375295	0.0147835
6330403K07Rik	0	0	0	0
6330403L08Rik	0.00886072	0	0.0448458	0.0489502
6330408M09Rik	0.0698706	0.0758224	0.157614	0.231732
6330409D20Rik	0	0	0	0
6330411D24Rik	0.327412	0.00947968	0	0
6330415G19Rik	0.0996123	0.0664081	0.0558633	0.084453
6330418K02Rik	0.086073	0.0881433	0.127925	0.180138
6330562C20Rik	0.124204	0	0.00991775	0.0290986
6430531B16Rik	0	0	0.058033	0.0765404
6430548M08Rik	0.123461	0.0574794	0.0352353	0.121516
6430550D23Rik	0.00845517	0	0	0
6430571L13Rik	0.0401254	0.0491182	0.09231	0
6430573P05Rik	0	0.0351545	0.0290003	0.0115885
6430590A07Rik	0.124398	0.121384	0.0174235	0
6530402F18Rik	0.0459791	0.0545796	0.117021	0.224564
6530403H02Rik	0	0	0.696231	0.673784
6530409C15Rik	0.0461736	0.0327123	0.00827936	0.0412018
6530437J22Rik	0	0	0	0
6720427I07Rik	0.188868	0.251962	0.232875	0.31404
6720483E21Rik	0	0	0.00396471	0
6720489N17Rik	0.0158441	0.0581072	0.00462884	0
6820408C15Rik	0	0	0.21177	0.108132
8030453O22Rik	0	0	0	0
8030456M14Rik	0	0.0399902	0.0623212	0.0362526
8030462N17Rik	1.0228	0.228835	0.209997	0.230872
8430419K02Rik	0	0	0	0.0112629
8430429K09Rik	0.153853	0.13631	0.179077	0.185296
8430432A02Rik	0.0160573	0.0524912	0.0636883	0.117841
9030025P20Rik	0.0183559	0.061257	0.0599881	0.0947798
9030407P20Rik	0.100693	0.0615108	0.0101238	0.0124626
9030612E09Rik	0	0	0.00822872	0.0649685
9030624G23Rik	0	0	0	0
9130008F23Rik	0.109488	0.00781016	0	0
9130017K11Rik	0	0.0203381	0	0
9130019O22Rik	0.0806708	0.0349982	0.0201337	0.0261893
9130019P16Rik	0	0	0.195331	0.135536
9130023H24Rik	0.0647359	0.0536829	0.0250839	0.0132699
9130024F11Rik	0	0	0	0
9130213A22Rik	0	0	0	0
9130221H12Rik	0.0530138	0.0964766	0.0669259	0.0111259
9130230N09Rik	0.0315389	0.117007	0.049506	0.0997424
9130401M01Rik	0.168169	0.0813201	0.200856	0.28672
9130604C24Rik	0.114344	0.082771	0.018586	0.00902199
9230102O04Rik	0.846448	0.485167	0	0
9230111E07Rik	0	0	0	0
9230112E08Rik	0	0	0	0
9230114K14Rik	0.051349	0.149004	0.570218	0.345745
9230116L04Rik	0	0	0	0
9230116N13Rik	0	0.017402	0.0439856	0.0542788
9330020H09Rik	0.11193	0.348633	0.196536	0.258379
9330102E08Rik	0	0	0	0
9330104G04Rik	0	0.0149363	0	0
9330117O12Rik	0	0	0	0
9330121J05Rik	0.0473411	0	0	0.0128447
9330136K24Rik	0	0	0.00389702	0
9330151L19Rik	0.185585	0.310625	0.195392	0.188917
9330154J02Rik	0	0	0	0
9330159F19Rik	0.0269419	0.010833	0.00591585	0.024625
9330159M07Rik	0	0	0	0.0092258
9330160F10Rik	0.0509093	0.0871541	0.0998983	0.170681
9330162012Rik	0.00910097	0	0.0101813	0.124487
9330175E14Rik	0	0	0	0
9330179D12Rik	0	0	0	0
9330182L06Rik	0	0	0	0
9330188P03Rik	0	0	0	0
9430015G10Rik	0.111053	0.0650439	0.053844	0.0472793
9430037G07Rik	0	0	0	0
9430038I01Rik	0.0618989	0.00428083	0.00803607	0.0341874
9430041J12Rik	0	0	0	0
9430060I03Rik	0.0311376	0.0443722	0.0653578	0.0460533
9430065F17Rik	0.0462345	0.0228026	0.00519381	0.0284666
9430078K24Rik	0	0	0	0
9430085M18Rik	0	0.00312455	0	0
9430091E24Rik	0	0	0.00358098	0.0104626
9530018F02Rik	0.0555716	0.126204	0.041966	0.0215384
9530026P05Rik	0	0	0.0202201	0.110564
9530051G07Rik	0.0105861	0.0215787	0.00647133	0
9530052E02Rik	0	0	0	0
9530059O14Rik	0	0	0	0
9530062K07Rik	0.0122028	0.00758143	0	0
9530068E07Rik	0.366113	0.267992	0.358216	0.232039
9530077C05Rik	0.31391	0.992208	0.396776	0.475245
9530080O11Rik	0.0293641	0	0	0
9530082P21Rik	0.0204679	0.0474641	0.0443776	0.130431
9530097N15Rik	0.158942	0.473315	0.00934	0.0241813
9630001P10Rik	0.0159618	0.00343004	0	0.0101044
9630013D21Rik	0	0.00422185	0	0
9630014M24Rik	0.176053	0	0	0
9830107B12Rik	0	0	0	0
9830132P13Rik	0	0	0	0
9830144P21Rik	0	0	0	0
9830166K06Rik	0.00959822	0	0	0
9930004E17Rik	0	0.00442855	0	0
9930012K11Rik	0	0	0	0
9930014A18Rik	0.0841036	0.0723845	0	0
9930021J03Rik	0.325069	0.332253	0.367932	0.371831
9930022D16Rik	0	0	0	0
9930104L06Rik	0.00886072	0.0980008	0.116664	0.126286
9930111J21Rik1	0	0	0	0
9930111J21Rik2	0.0153335	0	0.00470065	0.00944453
A030001D20Rik	0.0188143	0.134127	0.207667	0.221704
A130010J15Rik	0.166787	0.211569	0.0801046	0.0396038
A130014A01Rik	0.102056	0.2939	0.186188	0.199032
A130051J06Rik	0	0	0	0
A130077B15Rik	0	0	0	0
A230001M10Rik	0	0.00563732	0	0
A230005M16Rik	0	0.00761991	0	0
A230028O05Rik	0	0	0	0
A230051N06Rik	0.104745	0.0527957	0.192266	0.152722
A230056P14Rik	0	0	0	0
A230057D06Rik	0	0.00233824	0.0109306	0.0514384
A230059L01Rik	0	0.0287189	0	0
A230060F14Rik	0	0.00457984	0	0
A230065N10Rik	0	0	0.00364561	0.0198921
A230072C01Rik	0.0670844	0.0251146	0.0449481	0.0785874
A230072E10Rik	0	0.00629692	0.0281019	0
A230083G16Rik	0	0	0	0
A230083N12Rik	0	0	0.00777031	0
A230107N01Rik	0.0601132	0.0335893	0.028804	0.0115288
A2m	0	0.00510628	0.00365167	0.0157748
A2ml1	0	0.00982983	0.0823802	0.328631
A330023F24Rik	0.377077	0.26073	0.518109	0.536458
A330033J07Rik	0	0.00374206	0	0
A330035P11Rik	0.0794339	0.0283383	0.0135675	0.0255778
A330040F15Rik	0	0.00550101	0	0
A330041J22Rik	0.186137	0.100181	0.235972	0.366887
A330048O09Rik	0.0464757	0.41309	0.601732	0.719532
A330049N07Rik	0	0	0	0
A330074K22Rik	0	0.00668672	0	0
A330076H08Rik	0	0	0.0494258	0.185632
A330084C13Rik	0.0100418	0	0.00417572	0.0182742
A330093E20Rik	0	0.0146586	0	0
A330094K24Rik	0.0606461	0.0490112	0.0455656	0.024699
A330102I10Rik	0.0119583	0	0.0214763	0.0462357
A430005L14Rik	0.173253	0.26884	0.269968	0.26281
A430010J10Rik	0	0	0.00642402	0
A430018G15Rik	0.542748	0.131932	0.216703	0.326307
A430027H14Rik	0	0	0	0
A430033K04Rik	0.0587722	0.0960318	0.136373	0.111009
A430035B10Rik	0.248003	0.227097	0.170731	0.136755
A430072P03Rik	0.0453512	0.046481	0.351461	0.26952
A430073D23Rik	0	0	0	0
A430078I02Rik	0	0.00356101	0.00462275	0
A430105J06Rik	0.0730462	0.0292459	0.119725	0.0686677
A430106G13Rik	0.0341388	0.0195871	0	0.0146667
A430108G06Rik	0	0	0.0894282	0.121827
A430110L20Rik	0	0.00926569	0.0111602	0.0146733
A4galt	0	0	0	0
A530013C23Rik	0	0	0	0
A530016L24Rik	0.753757	0.879744	0.138163	0.0924809
A530017D24Rik	0.160459	0.139451	0.0430536	0.0455433
A530020G20Rik	0.0371967	0	0	0
A530032D15Rik	0	0	0	0
A530041M06Rik	0.0449605	0.0472193	0.0217041	0.0482882
A530053G22Rik	0.0232964	0	0	0
A530058N18Rik	0	0.019782	0.016133	0.0303885
A530064D06Rik	0	0	0	0
A530072M11Rik	0	0	0.00919984	0.0175388
A530083I20Rik	0	0.0647052	0.127172	0.0880949
A530084C06Rik	0	0	0	0
A530088E08Rik	0	0	0.085675	0.0137156
A630001G21Rik	0	0	0	0
A630023P12Rik	0	0	0	0
A630035G10Rik	0	0	0	0
A630052C17Rik	0	0.0472129	0.0628005	0.0572152
A630072M18Rik	0.0696514	0.345408	0.144996	0.0711555
A630076J17Rik	0	0	0.0518611	0.0130172
A630089N07Rik	0.0189177	0.0783024	0.134047	0.102219
A730011C13Rik	0	0.0223922	0.0316487	0.01476
A730017L22Rik	0.0515638	0.245559	0.0677816	0.0619848
A730020E08Rik	0	0.0028	0.109341	0.229873
A730020M07Rik	0	0	0	0
A730036I17Rik	0	0.00591958	0	0
A730056A06Rik	0	0	0	0
A730061H03Rik	0.0364925	0.0287636	0	0.0630958
A730063M14Rik	0.019957	0	0.067187	0.0390996
A730071L15Rik	0	0.0941569	0.0269645	0
A730081D07Rik	0	0	0	0
A830005F24Rik	0	0	0	0
A830008E24Rik	0	0	0	0
A830009L08Rik	0	0.0139443	0.0036283	0
A830011K09Rik	0	0	0	0
A830018L16Rik	0	0	0	0.0399227
A830019P07Rik	0.0223156	0	0.00887264	0.016359
A830035O19Rik	0	0	0	0.0218992
A830052D11Rik	0.0634202	0.00819374	0.0044665	0
A830082K12Rik	0.162509	0.172189	0.0222346	0.0092258
A830082N09Rik	0.0416868	0.019615	0.0337441	0.0356898
A930001A20Rik	0	0	0	0
A930001M01Rik	0.0514989	0.00445087	0	0
A930003A15Rik	0.0337617	0.012515	0	0
A930004D18Rik	0.0245765	0	0	0
A930005H10Rik	0.32962	0.282548	0.373428	0.419786
A930006K02Rik	0.0162622	0.0142753	0.0415156	0.0248957
A930007I19Rik	0.0107021	0.00313957	0.0304661	0
A930009A15Rik	0.542264	0.67429	0.363159	0.139587
A930012L18Rik	0	0	0	0
A930012O16Rik	0	0	0.00399899	0.0125372
A930015D03Rik	0.0744953	0.142046	0.149576	0.219069
A930018P22Rik	0	0	0.00863078	0.0198374
A930024E05Rik	0	0.036373	0.0637652	0.103695
A930028N01Rik	0	0.0278717	0	0
A930029G22Rik	0.0262821	0.0587919	0.0445162	0.017757
A930031H19Rik	0	0	0	0
A930033H14Rik	0.563885	1.32794	1.19703	0.475249
A930037H05Rik	0	0.00682656	0.0295143	0.0287964
A930041C12Rik	0	0	0.123696	0.204629
AA386476	0.0119583	0.00486001	0.00471958	0
AA388235	0	0	0	0
AA465934	1.57418	2.35214	1.64682	1.51907
AA467197	0	0	0	0
AA986860	0	0.00421356	0.00706726	0
Aaas	0.0320994	0.00746312	0.043676	0.0500611
Aacs	0.248973	0.21378	0.18082	0.275409
Aagab	0.277295	0.202949	0.190684	0.181006
Aak1	0.572463	0.823053	0.853843	0.625393
Aamdc	0.662682	0.45927	0.389711	0.486625
Aamp	0.845158	0.71261	1.05721	0.707466
Aar2	0.321687	0.186991	0.220419	0.27907
Aard	0.0229901	0.0170323	0.0401043	0.0115268
Aars	0.214155	0.240834	0.230989	0.138771
Aars2	0.163478	0.0545994	0.116637	0.148719
Aarsd1	0.565301	0.648023	0.732654	0.799815
Aasdh	0.11549	0.125646	0.125138	0.10796
Aasdhppt	0.261058	0.254694	0.360856	0.294257
Aass	0.0162376	0.00397696	0.00620405	0
Aatf	0.153981	0.115983	0.166112	0.225314
Aatk	0.145346	0.0199213	0.0369356	0.135989
AB124611	0.314366	0.182804	0.398128	0.360869
Abat	0.075669	0.193976	0.0851494	0.0137826
Abca1	0.10483	0.0250949	0.0115094	0.154454
Abca13	0	0	0.0102941	0.0115288
Abca2	0.242643	0.412503	0.623691	0.679502
Abca3	0.295429	0.301114	0.522557	0.552113
Abca4	0.0229901	0	0	0
Abca5	1.90795	2.20464	1.59487	1.15396
Abca6	0.104079	0.147436	0.0917371	0.0179708
Abca7	0.207568	0.412416	0.0648964	0.0655645
Abca8a	0.0229901	0	0	0
Abca8b	0.0253805	0	0	0
Abca9	0.0447344	0.0179399	0.0197432	0
Abcb10	0.0568423	0.0812569	0.0706608	0.095275
Abcb1a	0	0.0069114	0	0
Abcb1b	0	0	0	0
Abcb4	0	0	0	0.0126298
Abcb6	0.187674	0.0754593	0.122264	0.050055
Abcb7	0.234719	0.274658	0.371219	0.257585
Abcb8	0.210614	0.127267	0.130797	0.165506
Abcb9	0	0.288488	0.083621	0.0521542
Abcc1	0.0476443	0.109605	0.065648	0.0878614
Abcc10	0.113337	0.11341	0.0651748	0.107828
Abcc2	0	0	0	0.0289351
Abcc3	0.0371049	0	0	0
Abcc4	0	0.00825229	0.00693798	0.209484
Abcc5	0.457423	0.413772	0.328789	0.470466
Abcc8	0.105318	0.30286	0.0322493	0.0363816
Abcc9	0.0299864	0.0115556	0	0
Abcd1	0.0566714	0.0418882	0.00818721	0.0104626
Abcd2	0.107166	0.0594008	0.0825587	0.0881425
Abcd3	0.277401	0.114622	0.197185	0.226095
Abcd4	0.062817	0.0722678	0.167283	0.170097
Abce1	0.439119	0.25345	0.343578	0.391535
Abcf1	0.606724	0.591577	0.696864	0.651582
Abcf2	0.36897	0.646539	0.298868	0.391103
Abcf3	0.373236	0.286956	0.281253	0.253186
Abcg1	0.0701596	0.38075	0.0850801	0.0450291
Abcg2	0.043655	0.00591958	0.00853594	0
Abcg3	0	0	0	0
Abcg4	0.0258517	0	0	0
Abhd10	0.0937215	0.167343	0.189014	0.24002
Abhd11	0.124624	0.0325287	0.0242268	0.0383278
Abhd12	1.57417	0.496744	0.377097	0.511088
Abhd13	0.358076	0.325426	0.11165	0.180815
Abhd14a	0.0310771	0.244925	0.88446	0.77699
Abhd14b	0.0956527	0.177946	0.573575	0.649889
Abhd15	0.01112	0	0	0
Abhd16a	0.959779	0.984025	0.675864	0.610734
Abhd17a	0.644214	0.653177	0.558587	0.611164
Abhd17b	0.271544	0.0975857	0.402827	0.430372
Abhd17c	0.0788416	0.044899	0.0968103	0.144208
Abhd18	0.206443	0.213017	0.198033	0.263038
Abhd2	0.277309	0.0310777	0.0585224	0.130295
Abhd3	0.0145784	0	0.021237	0.0722818
Abhd4	0.208568	0.177339	0.210831	0.130177
Abhd5	0.149583	0.165371	0.125356	0.154087
Abhd6	0.355084	0.367787	0.217915	0.209503
Abhd8	0.481572	0.349594	0.438664	0.430062
Abi1	0.447522	0.342233	0.37762	0.426029
Abi2	0.433413	0.383712	0.450402	0.534887
Abi3	0	0	0	0
Abi3bp	0.127783	0	0.00520149	0.0152309
Abitram	0.185282	0.170137	0.146463	0.194544
Abl1	0.241797	0.141496	0.118661	0.172337
Abl2	0.381752	0.233864	0.226753	0.3998
Ablim1	0.139792	0.0524774	0.0219144	0.161062
Ablim2	0.445811	1.29815	0.898581	0.354138
Ablim3	0	0.538022	0.483343	0.183717
Abr	0.211728	0.0924946	0.523213	0.537646
Abracl	0.1995	0.0789498	0.025213	0.104778
Abraxas1	0.153602	0.127775	0.146223	0.139754
Abraxas2	0.229696	0.245964	0.171029	0.157256
Abt1	0.205548	0.245284	0.166128	0.28835
Abtb1	0.105379	0.139476	0.146912	0.201069
Abtb2	0.0658407	0.0156816	0.0708105	0.115004
AC103362.1	0	0	0	0
AC106834.1	0	0	0.00439941	0.167585
AC109619.1	0.0410492	0.0113499	0.011666	0.0130172
AC113595.1	0	0	0	0
AC132307.1	0.0543564	0.0730928	0.0282673	0.0363529
AC133103.1	0	0	0	0
AC149090.1	0.336176	0.26879	0.18607	0.143875
AC151602.1	0	0	0.0302936	0.0143681
AC154200.1	0	0	0	0
AC156546.1	0	0	0	0
AC160336.1	0.0836057	0.0871576	0.105453	0.116888
AC160966.1	0.0393995	0	0	0
AC166172.1	0.130784	0.106345	0.138868	0.123113
AC168977.1	0	0.00261335	0.00389098	0
AC168977.2	0	0	0	0
AC241534.1	0.120133	0.0731332	0.0566512	0.0236206
Acaa1a	0.114789	0.0860697	0.15526	0.145058
Acaa1b	0	0.0185031	0.0215695	0.0175388
Acaa2	0.0783955	0.0314274	0.144426	0.1857
Acaca	0.343138	0.140974	0.12659	0.220289
Acacb	0.0162376	0.0346338	0.0126112	0.0318894
Acad10	0.0449106	0.0601228	0.0597655	0.0359264
Acad11	0.948298	0.721949	0.206114	0.254915
Acad12	0	0.0387834	0.108134	0.0222225
Acad8	0.132841	0.0743045	0.0809094	0.0772079
Acad9	0.0595531	0.15451	0.160197	0.0854502
Acadl	0.123407	0.0331878	0.0336789	0.112755
Acadm	0.573796	0.312483	0.332327	0.396606
Acads	0.16087	0.0677723	0.125256	0.0433335
Acadsb	0.6999	0.725398	0.421521	0.440973
Acadvl	0.263572	0.163019	0.163493	0.185926
Acan	0.0130636	0	0	0.0101044
Acap1	0	0.00700491	0	0
Acap2	0.262142	0.252648	0.177727	0.213902
Acap3	0.142615	0.181863	0.100509	0.168279
Acat1	0.213972	0.302804	0.305615	0.292721
Acat2	0.207866	0.114985	0.435378	0.387635
Acat3	0	0.00829331	0	0.0111564
Acbd3	0.860751	0.879263	0.788711	0.616414
Acbd4	0.50453	0.297924	0.300933	0.222968
Acbd5	0.761647	0.489324	0.63959	0.68121
Acbd6	0.665801	0.625143	0.575555	0.849942
Acbd7	2.82546	2.94871	2.50583	3.0871
Accs	0.0347625	0.0424397	0.00391874	0.0639785
Acd	0.149695	0.347755	0.197544	0.276673
Ace	0	0	0	0
Ace2	0	0	0	0
Acer2	0.16311	0.29195	0.0548142	0.0392245
Acer3	0.0982953	0.0777224	0.0595395	0.17007
Ache	0.14491	0.00755093	0.0914952	0.0675221
Acin1	0.792442	0.980253	0.984622	0.965291
Ackr1	0	0.00591958	0	0
Ackr3	0.0625008	0	0.115402	0.110414
Ackr4	0.168633	0.00547095	0	0.0426582
Acly	0.412544	0.480977	0.402966	0.439225
Acmsd	0	0	0	0
Aco1	0.184942	0.14998	0.0848806	0.0927971
Aco2	0.619945	0.856921	0.633783	0.692493
Acot1	0.088133	0.00227036	0.0723714	0
Acot11	0	0	0.0049384	0
Acot13	0.415975	0.370806	0.738548	0.56602
Acot2	0.0834698	0.324923	0.212308	0.148525
Acot5	0	0	0	0.0216497
Acot6	0.0233212	0.032378	0.0288882	0.0682414
Acot7	0.907108	1.11963	0.580023	0.69166
Acot8	0.262125	0.207383	0.135818	0.207053
Acot9	0.0863782	0.0347191	0	0.0115947
Acox1	0.499991	0.311718	0.327772	0.353272
Acox2	0	0	0.0094742	0.0175388
Acox3	0.150872	0.162666	0.128607	0.086404
Acp1	0.616223	0.700318	0.736557	0.900507
Acp2	0.329147	0.307821	0.318423	0.351069
Acp5	0	0	0	0
Acp6	0.0563898	0.0190566	0.0693663	0.10358
Acp7	0.0297255	0.00492053	0.472928	0.308273
Acpp	0.0118621	0	0.00567149	0.0117691
Acrbp	0.043205	0.130201	0.0815905	0.0809035
Acsbg1	0	0.00473585	0	0
Acsf2	0.0724571	0	0.00405341	0.0216895
Acsf3	0.157891	0.118457	0.0727692	0.0450788
Acsl1	0.755121	1.67813	1.32457	0.491034
Acsl3	1.51029	0.836848	1.11991	1.82595
Acsl4	1.25137	1.1004	0.786862	1.07051
Acsl5	0.0721401	0.00700491	0.0185991	0.107263
Acsl6	0	0.0142074	0	0.0270414
Acss1	0	0	0	0
Acss2	0.742104	0.900785	1.60626	1.01549
Acss3	0.218223	0.0197987	0.524948	0.554222
Acta1	0	0	0.0134536	0.0488411
Acta2	0	0	0	0
Actb	2.22357	1.02311	1.42542	1.6104
Actg1	1.93014	1.52501	1.48081	1.89651
Actl6a	0.308111	0.316816	0.238269	0.257033
Actl6b	0.141149	0.169286	0.335119	0.237017
Actn1	0.246853	1.11566	0.228405	0.174573
Actn2	0	0	0.00466199	0
Actn3	0	0.00616507	0.00529872	0
Actn4	1.02383	1.24228	0.579904	1.08968
Actr10	1.06246	0.757333	0.705152	0.806333
Actr1a	0.315854	0.24065	0.197227	0.228001
Actr1b	0.256642	0.312755	0.195688	0.241951
Actr2	0.496285	0.379071	0.471125	0.301185
Actr3	0.57199	0.495594	0.605408	0.842193
Actr3b	0.0464509	0.0994859	0.231308	0.371129
Actr5	0.0585676	0.0734713	0.0582159	0.0580322
Actr6	0.208281	0.168082	0.287913	0.249105
Actr8	0.291397	0.363079	0.479889	0.441771
Acvr1	0.136293	0.0396191	0.0968309	0.260753
Acvr1b	0.107976	0.205701	0.0475838	0.104212
Acvr1c	0	0.0550008	0	0
Acvr2a	0.250394	0.520907	0.173565	0.162794
Acvr2b	0.0778858	0.0702714	0.164381	0.178375
Acvrl1	0.0111945	0.00417722	0.00473739	0
Acy1	0.0483123	0	0.0178999	0
Acy3	0.0255383	0.0124612	0	0.0809295
Acyp1	0.490456	0.563291	0.485294	0.466167
Acyp2	0.485528	0.074742	0.339101	0.566203
Ada	0	0.0039675	0	0
Adal	0.100893	0.11806	0.140592	0.182847
Adam10	0.459251	0.237861	0.235098	0.327882
Adam11	0	0	2.39722	1.03628
Adam12	0.110808	0	0	0.0092258
Adam15	0.197699	0.109854	0.109471	0.163852
Adam17	0.136966	0.135035	0.144488	0.104136
Adam19	0	0.00324543	0	0
Adam1a	0.057286	0.0404692	0.0210398	0
Adam22	0.101055	0.0906396	0.264967	0.315219
Adam23	0.0430368	0.0122035	0.0273633	0.0116134
Adam33	0	0.00758143	0	0
Adam4	0.0538105	0	0.00598434	0
Adam8	0.0444681	0.0147502	0	0.0137826
Adam9	0.130338	0.101051	0.0470729	0.0629167
Adamts1	0.0349569	0.00697852	0.0103273	0
Adamts10	0	0.0202869	0.0133521	0
Adamts12	0	0	0	0
Adamts14	0	0	0	0
Adamts15	0	0	0.0512919	0.0575644
Adamts17	0	0.014938	0.0193243	0.0272126
Adamts19	0.0589643	0.0341529	0.368156	0.531124
Adamts2	0.0637848	0.00717907	0.00647133	0.020985
Adamts20	0	0	0	0
Adamts3	0	0.00475685	0	0
Adamts4	0	0	0	0
Adamts5	0	0	0	0
Adamts6	0.527881	0.0904428	0	0.0179708
Adamts7	0	0	0	0
Adamts9	0.0159618	0	0.0144675	0.0456237
Adamtsl1	0.0795582	0.413084	0.373091	0.283792
Adamtsl2	0	0	0	0
Adamtsl3	0	0.01552	0	0
Adamtsl4	0	0	0	0
Adamtsl5	0.0229901	0.00658121	0.00457462	0
Adap1	0.285924	0.351798	0.176209	0.0935582
Adap2	0.0102429	0.0121352	0	0.0152739
Adap2os	0	0	0	0
Adar	0.0679822	0.0718651	0.153388	0.185951
Adarb1	0.0863942	0.702006	0.330127	0.141921
Adarb2	0	0	0	0
Adat1	0.113085	0.103193	0.176467	0.103809
Adat2	0.0366608	0.0415621	0.0889672	0.0590589
Adck1	0.316624	0.438033	0.105155	0.0760823
Adck2	0.131237	0.20635	0.120815	0.218059
Adck5	0.154453	0.158307	0.232395	0.31755
Adcy1	0.0294591	0.00441683	0.0249818	0.292704
Adcy2	0.210105	0	0.045403	0.165109
Adcy3	0.0231171	0.00351598	0.0116838	0.00772997
Adcy4	0	0	0	0
Adcy5	0	0	0.00410645	0
Adcy6	0.0983691	0.195792	0.103333	0.0168166
Adcy7	0.0252187	0.00468853	0	0
Adcy8	0.0981377	0.273914	0.219523	0.26154
Adcy9	0.100836	0.164376	0.158636	0.254127
Adcyap1r1	0	0	0	0
Add1	0.573724	0.519303	0.491873	0.517889
Add2	0	0.0124621	0.00405341	0
Add3	0.305474	0.0428943	0.170644	0.252328
Adgb	0	0	0.155272	0.20433
Adgra1	0	0	0.162316	0.145737
Adgra2	0.0454635	0.010392	0	0
Adgra3	0.361854	0.19548	0.211308	0.346547
Adgrb1	0	0	0.0853794	0.100126
Adgrb2	0	0.317454	0.148965	0.312062
Adgrb3	0	0	0	0
Adgrd1	0.0480781	0.00695301	0.612647	0.0919972
Adgre1	0	0	0	0
Adgre4	0	0	0	0
Adgre5	0.0420335	0	0.0040902	0
Adgrf5	0	0.00221771	0	0
Adgrg1	0	0.00617521	0.0616214	0.0784937
Adgrg2	0	0	0	0
Adgrg3	0	0	0	0
Adgrg5	0	0	0.00446083	0
Adgrg6	0.0386646	0	0.0320102	0.359657
Adgrl1	0.333296	0.463132	0.302682	0.328736
Adgrl2	0.217525	0.0104633	0.440666	0.279768
Adgrl3	0.0796937	0.00878366	0.110507	0.360019
Adgrl4	0	0	0	0
Adgrv1	0.345682	0.228201	0.605714	0.583248
Adh1	0	0.00834218	0	0
Adh5	0.260431	0.14211	0.21047	0.319809
Adhfe1	0.06636	0.00687974	0	0.0285187
Adi1	0.391305	0.459768	0.558906	0.69717
Adig	0	0.019757	0.00444279	0
Adipoq	0	0	0	0
Adipor1	1.00733	0.967755	1.0826	0.992063
Adipor2	1.12357	1.46365	0.362051	0.33755
Adk	0.242389	0.103425	0.183869	0.182253
Adm	0	0	0	0
Adnp	0.573662	0.693083	0.690555	0.748384
Adnp2	0.12135	0.117647	0.0898759	0.189471
Ado	0.189748	0.234318	0.116179	0.166981
Adora1	0	0.00700164	0	0
Adora2a	0	0	0	0
Adora2b	0	0	0.00389529	0.0157748
Adora3	0	0	0	0
Adpgk	0.110091	0.0674848	0.0436665	0.108228
Adprh	0.514481	0.565174	0.429889	0.537852
Adprhl1	0.265984	0.335231	0.0857832	0.235089
Adprhl2	0.262944	0.22982	0.336328	0.280859
Adprm	0.171585	0.349381	0.274185	0.253408
Adra1b	0.01305	0	0	0
Adra2a	0	0	0	0
Adra2c	0	0.00274222	0	0
Adrb1	0	0	0	0
Adrb2	0.0169936	0.00704765	0.00885973	0
Adrm1	0.256274	0.262917	0.30692	0.19094
Adsl	0.0621881	0.191856	0.243407	0.215224
Adss	0.161979	0.282343	0.829787	0.671371
Adssl1	0.0213529	0	0.139597	0.146396
Adtrp	0	0	0	0
Aebp1	0.180173	0.0643205	0.234137	0.0464548
Aebp2	0.436101	0.293399	0.287641	0.394037
Aen	0.067171	0.0525378	0.0425106	0.0304956
AF067061	0	0	0	0
Afap1	0.234731	0.652725	0.449561	0.494135
Afap1l1	0.0860668	0.012717	0.0273042	0.0283115
Afap1l2	0.166074	0.0162873	0.00926557	0.0442176
Afdn	1.12587	1.32756	0.94269	1.61232
Aff1	0.279896	0.243035	0.0755884	0.110789
Aff2	0	0.0042626	0.00436662	0
Aff3	0.0459168	0.32638	0.101374	0.0267917
Aff4	0.89757	0.926011	0.774596	0.926747
Afg1l	0.0395437	0.0204701	0.112931	0.100967
Afg3l1	0.286399	0.373685	0.319966	0.349271
Afg3l2	0.377396	0.404176	0.318579	0.351561
Afmid	0.0130636	0.0617404	0.014888	0
Afp	0	0	0.00560994	0
Aftph	1.68533	2.02982	1.64344	1.11807
Aga	0.116263	0.0406608	0.0854062	0.0737974
Agap1	0.679851	0.510924	0.960016	1.01583
Agap2	0	0	0	0
Agap3	0.248444	0.309466	0.199098	0.247144
Agbl1	0	0	0	0
Agbl2	0	0	0.385924	0.215479
Agbl3	0.0672183	0.157715	0.336747	0.290802
Agbl4	0.0855626	0	0.21794	0.319858
Agbl5	0.0733566	0.0578282	0.126869	0.096134
Ager	0	0.0257254	0.0040902	0
Agfg1	0.453998	0.489764	0.444495	0.426543
Agfg2	0.382407	0.0639883	0.587833	0.533366
Aggf1	0.500498	0.597165	0.486982	0.611669
Agk	0.16702	0.0635437	0.120959	0.142564
Agl	0.239769	0.197109	0.105813	0.0892659
Agmat	0	0	0	0
Agmo	0.0105861	0	0	0
Ago1	0.225248	0.223799	0.188879	0.402559
Ago2	0.272551	0.696665	0.428268	0.591071
Ago3	0.377558	0.27938	0.297308	0.241192
Ago4	0.380832	0.106218	0.207095	0.0801215
Agpat1	0.225683	0.168415	0.156413	0.178929
Agpat2	0.118	0.946747	0.0253696	0.0306788
Agpat3	0.997213	0.665263	0.619668	0.605474
Agpat4	0.0781491	0.202547	0.653554	0.317337
Agpat5	0.467162	0.616519	0.325104	0.437307
Agps	0.253204	0.332082	0.208245	0.235301
Agr2	0.01305	0	0.00396471	0
Agr3	0.143234	0	0.078897	0.699381
Agrn	0.0451897	0.01076	0.0799145	0.0952858
Agrp	0	0	0	0
Agt	0	0	0	0.0147835
Agtpbp1	0.394619	0.304537	0.694074	0.323726
Agtr1a	0	0	0	0
Agtrap	0.302944	0.243947	0.303314	0.316373
Ahctf1	0.340269	0.383085	0.345495	0.383115
Ahcy	0.0155171	0.0124669	0	0
Ahcyl1	0.45757	0.351829	0.45581	0.565787
Ahcyl2	0.502904	0.306955	0.314433	0.430965
Ahdc1	0.203761	0.346113	0.0701694	0.0759136
Ahi1	0.71174	0.85927	1.77618	1.77355
Ahnak	0.219772	0.199199	0.0617744	0.211394
Ahnak2	0	0	0	0
Ahr	0.143751	0.135438	0.364791	0.23634
Ahsa1	0.502501	0.585596	0.713516	0.766757
Ahsa2	0.442431	0.46183	0.449612	0.607585
AI197445	0.0297255	0	0	0
AI413582	0.565114	0.880104	0.587105	0.49511
AI427809	0	0	0	0
AI429214	0.0767909	0.0758385	0.0358348	0.0655278
AI463170	0	0	0	0
AI463229	0	0	0	0
AI467606	0	0	0	0.0216497
AI480526	0.323086	0.368395	0.382732	0.38984
AI504432	0.0111945	0	0	0
AI506816	0	0.0134617	0	0
AI593442	1.67764	1.91517	1.61787	0.910053
AI597479	0.337539	0.143943	0.19769	0.235605
AI661453	0.164218	0.0483335	0.00323018	0.0128447
AI662270	0	0.0157825	0.00336114	0
AI837181	0.209523	0.279724	0.239311	0.187
AI839979	0	0	0	0.0146667
AI854703	0	0	0	0
AI987944	0.123201	0.196535	0.118104	0.215374
Aida	0.111483	0.347242	0.188351	0.222978
Aif1	0	0.012802	0.0071893	0.0216497
Aif1l	1.38949	1.29635	1.18641	0.650715
Aifm1	0.630966	0.785476	0.477051	0.479742
Aifm2	0.0570601	0.0151692	0.0135655	0.0117948
Aifm3	0.0779355	0.335581	0	0
Aig1	0.877925	0.599017	1.18875	1.06982
Aim2	0.0322641	0	0	0
Aimp1	0.701482	0.608833	0.965228	1.00802
Aimp2	0.158924	0.214985	0.12927	0.159007
Aip	0.408751	0.31397	0.312258	0.379643
Airn	0.0614293	0	0.0234363	0.0438209
Ajap1	0	0	0	0
Ajm1	0	0	0.0181585	0
Ajuba	0	0	0	0.0123983
Ak1	0.184001	0.748836	0.611183	0.313791
AK157302	0	0	0	0
Ak2	0.350212	0.623323	0.252832	0.223524
Ak3	0.0204178	0.0567722	0.0981945	0.129612
Ak4	0	0.0091994	0.0148986	0.0111221
Ak5	0.0433097	0.0114811	0.0230233	0.0104626
Ak6	0.19465	0.258144	0.288344	0.215669
Ak7	0	0	0.128337	0.112141
Ak8	0	0	0.207581	0.218227
Ak9	0	0	0.541393	0.548842
Akain1	0	0	0	0
Akap1	0.0243935	0.122143	0.0451498	0.0376698
Akap10	0.310434	0.209204	0.154038	0.120364
Akap11	0.553996	0.707471	0.573354	0.709373
Akap12	0.500641	0.0499149	0.0336615	0.557683
Akap13	0.412179	0.133282	0.179263	0.350589
Akap14	0	0	0.179775	0.618418
Akap17b	0.177485	0.128971	0.163104	0.301924
Akap5	0.0374375	0	0	0
Akap6	0.260881	0.146667	0.915191	0.868303
Akap7	0.0609745	0.108333	0.217883	0.240756
Akap8	0.373713	0.780142	0.420394	0.425231
Akap8l	0.825311	1.09032	1.22431	1.13353
Akap9	2.16037	2.56163	2.57471	2.33124
Akip1	0.0374885	0.0491296	0.125309	0.17262
Akirin1	0.796692	0.614403	0.594675	0.633761
Akirin2	0.641438	0.537584	0.474201	0.557065
Akna	0	0	0.00602744	0.0436374
Aknad1	0.0205226	0.115182	0.0219756	0.0706979
Akr1a1	1.09601	0.376277	0.722732	1.23265
Akr1b10	0.129394	0.107991	0.134792	0.154281
Akr1b3	1.22568	1.69716	0.526555	0.290563
Akr1b8	0	0	0.0044171	0
Akr1c13	0	0	0.0106463	0
Akr1c14	0	0	0	0
Akr1c19	0	0	0	0
Akr1cl	0.0449605	0	0	0
Akr1e1	0.0655128	0.0294283	0.0794456	0.0510355
Akr7a5	0.499747	0.36066	0.538854	0.384242
Akt1	0.362896	0.180284	0.172123	0.157876
Akt1s1	0.199094	0.293473	0.246898	0.243696
Akt2	0.677062	0.595346	0.812984	0.722915
Akt3	0.445575	0.531942	0.620725	0.429587
Aktip	0.469943	0.295641	0.382759	0.489743
Alad	0.670025	0.573738	0.341898	0.355775
Alas1	0.0904654	0.119058	0.131738	0.187778
Alas2	0.0341394	0.102413	0.0406584	0.114765
Alcam	0.0737365	0.00348013	0.010377	0.195191
Aldh16a1	0.0566017	0.0642984	0.0321769	0.0761749
Aldh18a1	0.101258	0.0623148	0.0573419	0.0800239
Aldh1a1	0.257786	0.0211086	0.0454354	0.12832
Aldh1a2	0.0108347	0.0120723	0.019537	0.076958
Aldh1a3	0.0229901	0.00500417	1.03004	0.964333
Aldh1a7	0	0	0	0.0229263
Aldh1b1	0.0824058	0	0	0
Aldh1l1	0	0	0	0
Aldh1l2	0	0	0	0
Aldh2	0.369545	0.218989	0.42482	0.348412
Aldh3a1	0	0.00384261	0	0
Aldh3a2	0.0984444	0.0474582	0.0206915	0.0641356
Aldh3b1	0.026962	0.169942	0.147496	0.0763514
Aldh3b2	0	0	0	0
Aldh3b3	0	0	0	0
Aldh4a1	0.189426	0.153779	0.202844	0.122155
Aldh5a1	0.159085	0.0179814	0.070981	0.049123
Aldh6a1	0.181715	0.0991127	0.0505843	0.122249
Aldh7a1	0.245235	0.0536261	0.184558	0.370868
Aldh9a1	0.223234	0.131653	0.216114	0.202639
Aldoa	1.43256	1.21523	1.62133	1.50652
Aldoc	0.189933	0.0206971	0.0298984	0.541253
Alg1	0.16733	0.155223	0.106178	0.234879
Alg10b	0.197019	0.190639	0.27558	0.285921
Alg11	0.122476	0.118418	0.208622	0.127808
Alg12	0.202785	0.128016	0.0761607	0.0132456
Alg13	0.135718	0.0537334	0.0418048	0.102886
Alg14	0.152091	0.100825	0.0339256	0.0473047
Alg2	0.562388	0.379247	0.417694	0.393468
Alg3	0.0453196	0.0463259	0.0233371	0.0323839
Alg5	0.13783	0.18275	0.22098	0.238128
Alg6	0.069069	0.0768134	0.0741565	0.162578
Alg8	0.0206179	0.0399587	0.0463497	0.0116509
Alg9	0.186875	0.0820557	0.0496832	0.101181
Alk	0.324952	0	0	0
Alkbh1	0.283322	0.333778	0.215227	0.283861
Alkbh2	0.129024	0.0402726	0.0664767	0.00989198
Alkbh3	0.196055	0.149802	0.136512	0.0270414
Alkbh4	0.0349224	0.0748491	0.0265734	0.0596897
Alkbh5	0.622741	0.714643	0.684454	0.728004
Alkbh6	0.525208	0.274347	0.487668	0.509193
Alkbh7	0.283366	0.186427	0.298516	0.316334
Alkbh8	0.23375	0.17329	0.271478	0.299177
Alms1	0.138782	0.0549438	0.188156	0.246826
Alox12	0.0525801	0	0	0
Alox12e	0	0	0	0
Alox15	0	0	0	0
Alox5	0.00910097	0	0	0
Alox5ap	0.049057	0.0120581	0.00866636	0
Aloxe3	0	0.00232161	0.0212427	0.0134263
Alpk1	0.0899014	0.0103983	0.017958	0.0246886
Alpk2	0	0	0	0
Alpl	0.0223345	0	0	0
Als2	0.0885955	0.0435196	0.0678494	0.114417
Als2cl	0.0436956	0.0951704	0.0195525	0.0853124
Alx1	0	0	0.0100509	0
Alyref	0.593814	0.527501	0.457134	0.535787
Alyref2	0.222447	0.104111	0.267121	0.356271
Amacr	0.0589492	0.0907061	0.122463	0.180868
Ambra1	0.0861234	0.179515	0.152398	0.129111
Amd1	0.394429	0.255199	0.258525	0.301299
Amd2	0	0.0200384	0.0263438	0.05735
Amdhd1	0	0	0	0
Amdhd2	0.27802	0.120012	0.11686	0.193233
Amer1	0.052486	0.00881755	0.0827921	0.135567
Amer2	0.239802	0.0131357	0.226865	0.471515
Amer3	0	0	0.00625038	0.18038
Amfr	0.812528	0.840731	0.662853	0.690875
Amigo1	0.232169	0.283407	0.618219	0.182916
Amigo2	0	0	0.0155299	0
Amigo3	0	0.00505471	0	0
Ammecr1	0.0615958	0.0959805	0.0838631	0.172357
Ammecr1l	0.20107	0.203162	0.235204	0.21624
Amn1	0.425131	0.296355	0.312212	0.402992
Amot	0.691963	0.0322742	0.0391157	0.201911
Amotl1	0.518563	0.0183618	0.0453072	0.144838
Amotl2	0.179292	0.989973	0.189015	0.216704
Ampd2	0.225921	0.148092	0.144875	0.0807545
Ampd3	0.0795039	0.103897	0.01714	0.0109035
Amph	0.68782	0.326211	0.483554	0.449884
Amt	0.132571	0.0204136	0.107655	0.114316
Amy1	0.0159618	0.0251119	0.16296	0.129748
Amz1	0	0.011347	0.0142277	0
Amz2	0.311709	0.275592	0.353174	0.303328
Anapc1	0.428412	0.464496	0.315702	0.163105
Anapc10	0.147667	0.153489	0.136938	0.107
Anapc11	0.589027	0.311135	0.45506	0.551777
Anapc13	1.14889	1.07974	0.921235	0.863812
Anapc15	0.249754	0.161357	0.10363	0.0985371
Anapc16	0.461805	0.449649	0.503739	0.601348
Anapc2	0.401447	0.352196	0.294507	0.351003
Anapc4	0.308014	0.282222	0.362149	0.278258
Anapc5	0.321582	0.440838	0.247265	0.393617
Anapc7	0.293652	0.219919	0.22973	0.177163
Ang	0	0	0	0
Angel1	0	0.0740043	0.0366362	0.109099
Angel2	0.512681	0.596901	0.329614	0.282219
Angpt1	0	0.0933063	0	0
Angpt2	0	0	0.00436879	0
Angptl1	0	0.0153946	0	0.0152739
Angptl2	0.0305457	0.024518	0.0370891	0
Angptl3	0	0	0	0
Angptl4	0	0	0	0
Angptl6	0.146781	0.206045	0.351843	0.198508
Angptl7	0	0.00391577	0	0
Ank	0.415358	0.86137	0.347347	0.307389
Ank1	0.136765	0.0842458	0.264999	0.3656
Ank2	0.184443	0.0335691	0.0773882	0.036856
Ank3	0.964449	0.645795	0.518219	0.649041
Ankdd1b	0	0	0	0
Ankef1	0	0.00329964	0.195495	0.098203
Ankfn1	0.319015	0.813296	0.622428	0.691775
Ankfy1	0.231739	0.272911	0.170849	0.218888
Ankhd1	0.458918	0.509841	0.529311	0.464299
Ankib1	0.272446	0.20759	0.158765	0.21733
Ankle1	0	0	0	0
Ankle2	0.346049	0.364419	0.283867	0.29078
Ankmy1	0	0	0	0
Ankmy2	0.307194	0.139562	0.221123	0.224124
Ankra2	0.484908	0.415369	0.542128	0.697888
Ankrd10	0.11522	0.220996	0.244672	0.185318
Ankrd11	0.786312	1.07136	0.706291	0.887697
Ankrd12	1.16245	1.31582	1.30641	1.42645
Ankrd13a	0.136946	0.226777	0.110456	0.246305
Ankrd13b	0.451055	0.289036	0.223958	0.152283
Ankrd13c	0.339055	0.275157	0.232083	0.149106
Ankrd13d	0.479342	0.0818977	0.0208606	0.0104626
Ankrd16	0.149507	0.120261	0.172141	0.154747
Ankrd17	0.682144	0.653505	0.565	0.486256
Ankrd22	0.0619194	0.823127	0.0621913	0.044245
Ankrd23	0.0470737	0.0282286	0.0185036	0.0523983
Ankrd24	0.524601	0.928734	0.836178	1.23791
Ankrd26	0.0658071	0.123564	0.770376	0.390734
Ankrd27	0.0728884	0.0262046	0.0105806	0.0137011
Ankrd28	0.183376	0.281738	0.190886	0.0713315
Ankrd29	0.0679395	0.00443247	0.0124234	0
Ankrd33b	0	0	0	0
Ankrd34a	0	0	0	0
Ankrd34b	0	0	0.0185634	0
Ankrd35	0.010268	0	0.0140125	0.0111392
Ankrd37	0.215767	0.114705	0.547999	0.484851
Ankrd39	0.0951823	0.111353	0.168955	0.112233
Ankrd40	0.470953	0.428718	0.35965	0.338474
Ankrd42	0.105123	0.143349	0.393383	0.349045
Ankrd44	0.0130636	0.00391577	0.0643611	0.0125372
Ankrd45	0.0783119	0.00306147	0.286636	0.143773
Ankrd46	0.143616	0.0806809	0.120171	0.134573
Ankrd49	0.214951	0.3141	0.299136	0.213814
Ankrd50	0.292198	0.142183	0.1401	0.104863
Ankrd52	0.0688481	0.0529237	0.0464447	0.0656578
Ankrd54	0.205025	0.146293	0.280887	0.215226
Ankrd55	0	0	0	0
Ankrd6	0.065398	0.0378457	0.0050045	0.174643
Ankrd63	0	0	0	0.0151421
Ankrd9	0.0938437	0.124769	0.0348205	0.0780567
Anks1	0.249415	0.321485	0.285647	0.422825
Anks1b	0.111209	0.0294674	0.467597	0.652926
Anks3	0.262021	0.212631	0.182109	0.0536592
Anks6	0.0122127	0.0313025	0.0446953	0.0318394
Ankzf1	0.120258	0.116195	0.159857	0.0894927
Anln	0	0.00422185	0.0128366	0.0133053
Ano1	0	0	0.0039881	0
Ano10	0.537274	0.92019	0.0364222	0.2031
Ano2	0	0	0.0638679	0
Ano3	1.06983	0.569363	1.06137	0.930741
Ano4	0.947215	0	1.09182	1.07999
Ano5	0	0	0	0
Ano6	0.119044	0.00386735	0.0372571	0.0417124
Ano8	0.140377	0.238036	0.127976	0.155307
Anp32a	0.597568	0.599401	0.738901	0.781931
Anp32b	1.65761	2.10749	1.18279	1.1851
Anp32e	0.892907	1.17689	1.24974	1.44356
Anpep	0.363005	0.00500918	0.00329251	0
Antxr1	0.0297255	0	0.00495651	0.0599373
Antxr2	0	0	0.00609433	0
Anxa1	0.124118	0.0204384	0.0166894	0.0374348
Anxa11	0.0111945	0.00254125	0.00997513	0.0111564
Anxa2	0.753117	0.143814	0.0704113	0.317342
Anxa3	0	0.00599761	0	0.0116134
Anxa4	0.0973805	0.0109016	0.375424	0.48612
Anxa5	1.93621	0.860742	1.29064	2.48376
Anxa6	0.239334	0.52708	0.0602415	0.317072
Anxa7	0.228166	0.0448449	0.257819	0.251815
Anxa9	0.0467499	0	0.0032668	0
Aoah	0	0	0	0
Aoc2	0.0135121	0.00645335	0.00511073	0
Aoc3	0	0	0	0
Aopep	0.55367	0.548103	0.528686	0.423285
Aox1	0.0319759	0	0	0
Aox2	0.112218	0	0.00439941	0
Aox3	0	0	0	0
Aox4	0	0	0	0
Ap1ar	0.68186	0.848807	0.827784	0.738317
Ap1b1	0.569931	0.371227	0.348151	0.398885
Ap1g1	1.14556	0.706544	0.704636	0.640749
Ap1g2	0	0	0	0
Ap1m1	0.112066	0.161139	0.22523	0.193178
Ap1m2	0.796127	0.555222	0.500149	0.402748
Ap1s1	0.719486	0.517396	0.641241	0.556142
Ap1s2	0.114338	0.00440258	0.187881	0.167689
Ap1s3	0.0403294	0.0205729	0.0335734	0.0335826
Ap2a1	0.491171	0.511257	0.534676	0.428692
Ap2a2	0.842915	1.56532	0.847952	0.728255
Ap2b1	0.578554	1.21905	1.2885	0.871168
Ap2m1	0.799453	0.567908	0.68537	0.619614
Ap2s1	0.586044	0.60072	0.57686	0.484661
Ap3b1	0.163175	0.144379	0.19536	0.274668
Ap3b2	1.64827	1.983	1.9385	1.88194
Ap3d1	1.04712	0.709114	0.559405	0.651891
Ap3m1	0.246495	0.168899	0.206133	0.260992
Ap3m2	1.30294	1.36762	1.04362	0.767018
Ap3s1	1.68693	0.306715	0.390517	0.667439
Ap3s2	0.645526	0.331496	0.264239	0.246386
Ap4b1	0.171928	0.0719404	0.0868015	0.0721725
Ap4e1	0.0813565	0.108101	0.116328	0.0838702
Ap4m1	0.0821802	0.13798	0.229921	0.218394
Ap4s1	0.319844	0.311689	0.401403	0.477514
Ap5b1	0.0707185	0.0752456	0.0133585	0.0441653
Ap5m1	0.268405	0.245618	0.146361	0.17361
Ap5s1	0.146142	0.103648	0.0469261	0.0962681
Ap5z1	0.0759246	0.0925081	0.0432963	0.0684781
Apaf1	0.0363298	0.0224011	0.0197066	0.0400396
Apba1	1.9674	1.81984	1.6616	1.6421
Apba2	0.104771	0	0	0
Apba3	0.0992935	0.0713133	0.0999792	0.034937
Apbb1	0.515431	0.458405	0.330368	0.275038
Apbb1ip	0	0	0	0.0123535
Apbb2	0.583402	0.166946	0.179347	0.228714
Apbb3	0.296799	0.214769	0.292672	0.134411
Apc	0.639603	0.54556	0.721604	0.838533
Apc2	0.0107927	0.00356778	0.0330646	0.0135978
Apcdd1	0.0516297	0	0.0174237	0.0135978
Apeh	0.219518	0.218559	0.182564	0.260606
Apex1	0.21017	0.276208	0.352083	0.264803
Apex2	0.0842052	0.0888722	0.0347056	0.0380691
Aph1a	0.40159	0.317334	0.287593	0.278496
Aph1b	0.274357	0.218906	0.331629	0.263645
Aph1c	0.101768	0.108573	0.102029	0.0505545
Api5	0.416119	0.546733	0.380384	0.424901
Apip	0.159252	0.111406	0.255514	0.27316
Aplf	0	0.044434	0.0400702	0.0624765
Apln	0	0.00842554	0.0196825	0.0223576
Aplp1	0.645816	0.986954	1.0944	0.6526
Aplp2	1.43063	1.72624	1.14199	1.0359
Apmap	0.138465	0.0802782	0.0941252	0.0904994
Apoa1	0	0.0070075	0.148834	0.135905
Apoa2	0	0.00876279	0	0
Apoa4	0.109233	0.00932322	0	0.0124626
Apoa5	0.0449605	0	0	0
Apobec1	0	0.00478109	0	0
Apobec2	0.0875114	0	0.0301629	0
Apobec3	0.0258517	0	0.00646251	0.00902199
Apobr	0	0	0	0.0104106
Apoc1	0.131238	0.0186627	0.0106818	0.0361189
Apoc2	0	0	0	0
Apoc3	0.0261256	0.0107815	0.00389529	0
Apoc4	0	0.0758119	0	0
Apod	0.988085	0.627171	1.14886	1.14666
Apoe	2.03639	0.667908	1.45368	1.45395
Apol10a	0	0	0	0
Apol11a	0	0	0	0
Apol11b	0	0	0	0
Apol7d	0	0	0	0
Apol8	0	0	0	0
Apold1	0.0545945	0.0270737	0.0586123	0.0945888
Apoo	0.406715	0.323829	0.52927	0.2758
Apool	0.0477164	0.059197	0.0559854	0.0898602
Apopt1	0.426855	0.325042	0.294533	0.539779
App	2.4429	2.47491	2.64109	2.10265
Appbp2	0.502227	0.411246	0.360061	0.458409
Appbp2os	0.0718361	0.00609981	0.00462762	0.0148444
Appl1	0.41902	0.421139	0.748556	0.756459
Appl2	0.600354	0.425094	0.196996	0.308924
Aprt	0.310968	0.120809	0.224982	0.258524
Aptx	0.155656	0.244735	0.190507	0.326192
Aqp1	0	0.0166317	0.00534546	0.0385351
Aqp11	0.290165	2.24635	0.0953871	0.100377
Aqp2	0	0.0168962	0	0
Aqp4	0.262587	0.0316011	0.0304351	0.0614823
Aqp5	0.0510519	0.450259	0.00566783	0.017658
Aqp9	0	0	0	0
Aqr	0.213092	0.401033	0.398966	0.443351
Ar	0.0427959	0	0.00403851	0.0932107
Araf	0.529326	0.649521	0.593135	0.512443
Arap1	0.150886	0.076345	0.0540229	0.0763745
Arap2	0.134459	0.00694496	0.212695	0.755524
Arap3	0	0	0	0
Arc	0	0	0	0
Arcn1	0.505242	0.439718	0.469241	0.423688
Arel1	0.184953	0.161029	0.0959101	0.153606
Arf1	1.2377	0.83181	0.887659	1.01236
Arf2	0.047939	0.113407	0.124324	0.131799
Arf3	1.73829	1.17666	1.54109	1.06572
Arf4	0.393317	0.268587	0.277863	0.315294
Arf4os	0	0	0	0
Arf5	2.42331	1.79516	1.34955	1.24989
Arf6	0.481137	0.302821	0.240474	0.331518
Arfgap1	0.120983	0.188523	0.184967	0.180809
Arfgap2	0.418657	0.318123	0.270051	0.241193
Arfgap3	0.152186	0.106778	0.242757	0.0909859
Arfgef1	2.25992	1.71328	1.33058	1.19756
Arfgef2	0.393636	0.381407	0.141302	0.243408
Arfgef3	0.195084	0.152821	0.415295	0.718408
Arfip1	0.355279	0.143079	0.133336	0.113582
Arfip2	0.100391	0.138799	0.160853	0.0993633
Arfrp1	0.557337	0.519715	0.381416	0.337433
Arg2	0	0.00524725	0.255763	0.172818
Arglu1	1.21417	1.48851	1.67087	1.33079
Arhgap1	0.226127	0.284115	0.242481	0.194298
Arhgap10	0.288783	0.56321	0.255901	0.126554
Arhgap11a	0.0148168	0.0183678	0	0
Arhgap12	0.140748	0.176642	0.153784	0.213778
Arhgap15	0	0	0	0
Arhgap17	0.392718	0.696779	0.343771	0.402205
Arhgap18	0.465697	0.439728	0.522387	0.371773
Arhgap19	0.0822193	0.0177908	0.112733	0.190137
Arhgap20	0.0838971	0.0126163	0.00405341	0.0907174
Arhgap20os	0	0	0	0
Arhgap21	0.275087	0.15633	0.163091	0.252383
Arhgap22	0	0	0	0
Arhgap23	0.0366198	0.0072379	0.015994	0.0115288
Arhgap24	0.195217	0.0304506	0.371725	0.27175
Arhgap25	0	0	0.00311179	0.0101044
Arhgap26	0.169689	0.439675	0.0428197	0.0753153
Arhgap27	0.0380936	0.320215	0.0217367	0.0233429
Arhgap27os1	0	0.0244969	0	0
Arhgap27os2	0.0228018	1.00911	0.0556053	0.106131
Arhgap27os3	0	0	0	0
Arhgap28	0.0980563	0.00555803	0.0117008	0.0280577
Arhgap29	0.0966948	0.0404685	0.0422851	0.0775963
Arhgap30	0	0.0203525	0.0040902	0.0123983
Arhgap31	0.149075	0.00823033	0.0107042	0.0401831
Arhgap32	0.646134	0.341326	0.780652	0.874856
Arhgap33	0.0419967	0	0.0919119	0.0299196
Arhgap35	0.90251	0.446489	0.554642	0.525234
Arhgap39	0.246347	0.242857	0.387642	0.397003
Arhgap4	0.0317464	0.0223617	0.0095412	0.0324016
Arhgap42	0.196198	0.0200811	0	0
Arhgap44	0	0.0384684	0.147966	0.14797
Arhgap45	0	0.0139928	0.010547	0.0194544
Arhgap5	1.32913	0.68723	1.30064	1.32111
Arhgap6	0	0	0	0.0499544
Arhgap8	0.147309	0.329979	0	0.0566174
Arhgap9	0	0.00528418	0.00311179	0.0216497
Arhgdia	0.552939	0.369997	0.404387	0.277097
Arhgdib	0.0326708	0.0303796	0.0506139	0.102838
Arhgdig	0.750921	0.32714	0.952185	0.405819
Arhgef1	0.186422	0.144412	0.0790497	0.142121
Arhgef10	0.184702	0.0358633	0.0161837	0.0623658
Arhgef10l	0.145798	0.00357884	0.0750565	0.0673674
Arhgef11	0.141451	0.083507	0.0969122	0.0967964
Arhgef12	0.389362	0.28798	0.432436	0.825396
Arhgef16	0.194481	0.669178	0.105743	0.0601013
Arhgef17	0.178475	0.0179436	0.260873	0.387332
Arhgef18	0.234798	0.161071	0.0583557	0.104044
Arhgef19	0.0417916	0	0.020113	0.0366067
Arhgef2	0.204479	0.00463784	0.129852	0.277172
Arhgef25	0.189334	0.0154118	0.0624315	0.153452
Arhgef26	0.0928618	0	0.00921863	0.0363728
Arhgef28	0.251264	0.508005	0.52653	0.609504
Arhgef3	0	0.00272233	0	0.0151421
Arhgef33	0.0122028	0.0236782	0.0749486	0.0698925
Arhgef37	0.128155	0	0	0.0243056
Arhgef38	0.0477563	0	0.00724498	0.112628
Arhgef39	0	0.00422185	0	0
Arhgef4	0.0148431	0.00617521	0.0429259	0.0383589
Arhgef40	0.084028	0.0172518	0.0169079	0.0734406
Arhgef5	0.102433	0.0135895	0.00616055	0.108963
Arhgef6	0.0176436	0.0187377	0.0157838	0
Arhgef7	0.251998	0.202758	0.424171	0.389124
Arhgef9	0.17511	0.0641393	0.1191	0.138982
Arid1a	0.827843	0.947839	0.78112	0.747607
Arid1b	0.255234	0.38885	0.393128	0.441509
Arid2	0.509414	0.383737	0.357302	0.293333
Arid3a	0.0946465	0.0659074	0.0685732	0.0513485
Arid3b	0.255293	0.80328	0.514254	0.481537
Arid4a	0.200155	0.367009	0.521915	0.548993
Arid4b	0.760247	1.12997	1.06164	0.953793
Arid5a	0.042514	0	0.0587493	0.178696
Arid5b	0.241918	0.00497763	0.0085313	0.247855
Arih1	0.676096	0.563477	0.494731	0.571398
Arih2	0.419733	0.528333	0.280964	0.189884
Arl1	0.749031	0.7135	0.841292	0.838423
Arl10	0.0229901	0.0171106	0.0176381	0.0150893
Arl11	0	0	0	0
Arl13b	0.115578	0.151379	0.325399	0.486927
Arl14ep	0.180957	0.183495	0.197097	0.23904
Arl15	0.196447	0.104974	0.133969	0.12079
Arl16	0.20088	0.193087	0.132966	0.160109
Arl2	0.629627	0.376548	0.636898	0.63616
Arl2bp	0.628986	0.46453	0.522173	0.426031
Arl3	0.632641	0.735902	1.16661	1.08928
Arl4a	0.470504	0.990461	1.09962	0.892756
Arl4aos	0	0.00783715	0	0
Arl4c	0.194689	0.0109682	0.337398	0.521823
Arl4d	0	0.00454518	0.00489576	0
Arl5a	1.61079	0.405188	0.487094	0.521731
Arl5b	0.111911	0.128462	0.0658226	0.0778281
Arl5c	0	0.00758143	0.00353845	0
Arl6	0.627476	0.304192	0.753094	0.754437
Arl6ip1	1.55545	1.22639	1.37971	1.46432
Arl6ip4	0.718508	0.740502	0.854382	0.780278
Arl6ip5	1.02784	0.888168	0.900987	1.29753
Arl6ip6	0.141366	0.153253	0.170861	0.243145
Arl8a	0.351173	0.150658	0.393658	0.397356
Arl8b	0.601148	0.526152	0.409043	0.392243
Armc1	0.587975	0.618593	0.529469	0.457468
Armc10	0.14551	0.117819	0.0708745	0.116071
Armc2	0.0487509	0.00584583	0.552589	0.417595
Armc3	0	0.00463641	0.267795	0.266339
Armc4	0	0	1.22666	1.10522
Armc5	0.0993688	0.1722	0.0501885	0.0994311
Armc6	0.0537784	0.0915405	0.0695655	0.0843725
Armc7	0	0.0465171	0.0154538	0
Armc8	0.345381	0.475994	0.386119	0.274635
Armc9	0.133212	0.15634	0.309822	0.337098
Armcx1	0.249326	0.0668958	0.17105	0.283837
Armcx2	0.222364	0.0153864	0.0718446	0.145186
Armcx3	0.509817	0.0807763	0.206182	0.200236
Armcx4	0.0148168	0	0.0098028	0.0605488
Armcx5	0.209503	0.129453	0.203702	0.259322
Armcx6	0.0522981	0.00568643	0.0437679	0.0249692
Armh1	0	0	0.0217079	0.0568957
Armh3	0.0784416	0.10118	0.111098	0.173666
Armh4	0.0632741	0.18688	0.0767537	0.0109274
Armt1	0.142445	0.0804632	0.0881685	0.0705287
Arnt	0.406719	0.346614	0.236709	0.353189
Arnt2	0	0.0409922	0.0115923	0.0338003
Arntl	0.107182	0.312608	0.115475	0.136839
Arntl2	0.123361	0.0602403	0.0701761	0.107649
Arpc1a	0.946221	0.766887	0.817773	0.788226
Arpc1b	0.200074	0.0653636	0.073399	0.0540954
Arpc2	1.09907	0.998898	1.01358	0.874496
Arpc3	0.850191	0.758259	0.724916	0.695296
Arpc4	0.657677	0.490552	0.304752	0.457037
Arpc5	0.691107	0.411624	0.370703	0.391952
Arpc5l	0.801857	0.71126	0.801284	0.813614
Arpin	0.0352833	0.0261324	0.068263	0.0789901
Arpp19	0.829902	0.644696	0.80711	0.851643
Arpp21	0	0	0.00564417	0.0817623
Arrb1	0.21218	0.00540205	0.039076	0.0128906
Arrb2	0.0431464	0.0475109	0.0562049	0.0484219
Arrdc1	0.331189	0.130051	0.130043	0.177184
Arrdc2	0.0668689	0.0637472	0.0229577	0.0683243
Arrdc3	0.140734	0.289232	0.390487	0.336733
Arrdc4	0.51679	0.690737	0.160483	0.128223
Arsa	0.105205	0.0495192	0.056064	0.0826944
Arsb	0.100146	0.0393061	0.0774542	0.0109828
Arsg	0.126236	0.00463069	0.0175357	0.0418613
Arsi	0	0	0	0
Arsk	0.0833927	0.0303786	0.0554575	0.0981433
Art1	0	0.0399059	0.323185	0.855985
Art3	0	0	0.436984	0.67894
Art4	0	0	0	0
Art5	0	0	0.0151698	0.131754
Artn	0.0804231	0.256568	0.140862	0.0493187
Arv1	0.0381928	0.13356	0.16949	0.197713
Arvcf	0.598901	0	0.127677	0.301475
Arxes1	0.0898071	0.0785946	0.246921	0.251902
Arxes2	0.158978	0.226213	0.509795	0.53378
As3mt	0.0864866	0.00508208	0.245127	0.318111
Asah1	0.447788	0.360636	0.283999	0.480256
Asah2	0	0.062961	0.0168957	0.0244813
Asap1	1.17638	1.33051	1.00128	1.11958
Asap2	0.0961181	0.020337	0.0179853	0.15939
Asap3	0	0.0461188	0.0130933	0.0217521
Asb1	0.361395	0.614575	0.278548	0.315185
Asb11	0	0	0	0
Asb13	0.0471296	0.148381	0.0659636	0.0394674
Asb16	0	0	0	0
Asb17	0	0	0	0
Asb17os	0	0	0	0
Asb2	0	0	0.0129212	0.0105049
Asb3	0.263597	0.185126	0.205998	0.125317
Asb4	0	0	0	0
Asb6	0.0107021	0.112839	0.067943	0.0395196
Asb7	0.121733	0.175825	0.283531	0.157945
Asb8	0.63723	0.511818	0.876278	0.479567
Ascc1	0.251611	0.230305	0.296278	0.299374
Ascc2	0.180306	0.179338	0.169568	0.252613
Ascc3	0.671641	0.78671	0.668271	0.537402
Ascl1	0	0	0	0
Ascl2	0	0	0	0
Ascl4	0.0104044	0.00312715	0	0
Asf1a	0.25244	0.304608	0.282917	0.289621
Asf1b	0.0258834	0.0264723	0.00402003	0.0284854
Asgr1	0	0.00727287	0.0220777	0.0162851
Ash1l	1.11822	1.30827	1.25939	1.16451
Ash2l	0.208185	0.236196	0.211294	0.298765
Asic1	0.749874	0.730516	0.173907	0.0305125
Asic2	0	0	0	0.0135978
Asic3	0.0226303	0	0	0
Asl	0.0397885	0.0952443	0.0793101	0.0463971
Asna1	0.508407	0.682553	0.618029	0.588827
Asns	0.253507	0.158669	0.0390162	0.216764
Asnsd1	0.693019	0.709012	0.763219	0.570637
Aspa	0	0.00281154	0	0
Aspg	0	0	0.106182	0.0217521
Asph	0.382613	0.0657376	0.145475	0.33264
Asphd1	0	0	0.0100116	0.0219231
Asphd2	0.67764	0.359373	0.709424	0.178507
Aspm	0	0.00264838	0.0123961	0
Asprv1	0	0	0	0
Aspscr1	0.220314	0.152493	0.0776158	0.0957806
Asrgl1	0.24319	0.307286	0.417796	0.670434
Ass1	0	0.00998403	0	0.0232648
Aste1	0.178008	0.0617173	0.135905	0.166016
Astn1	0	0	0.0452882	0.112507
Astn2	0	0	0	0
Asxl1	0.237028	0.156045	0.183748	0.228617
Asxl2	0.569464	0.466092	0.489643	0.38346
Asxl3	0	0	0.08511	0.0655069
Atad1	0.398185	0.231377	0.178114	0.361038
Atad2	0.229841	0.0501364	0.0500869	0.0371074
Atad2b	0.212351	0.550648	0.418542	0.505562
Atad3a	0.142435	0.127202	0.182686	0.208667
Atad3aos	0.0626768	0.108614	0.0634287	0.062369
Atad5	0.055302	0.0560964	0.0650251	0.0540647
Atat1	0.168655	0.285527	0.181063	0.18484
Atcay	0	0	0.0253463	0
Ate1	1.1587	1.25654	1.35353	1.39173
Atf1	0.134888	0.2336	0.306469	0.241938
Atf2	0.545475	0.466704	0.42659	0.485113
Atf3	0	0.0368743	0.00833455	0.0111221
Atf4	0.559363	0.584626	0.338218	0.615036
Atf5	0.0639057	0	0.0882661	0.175641
Atf6	0.696291	0.949521	0.400078	0.616605
Atf6b	0.221971	0.320547	0.203175	0.119874
Atf7	0.301487	0.239332	0.236759	0.169412
Atf7ip	0.841834	0.894519	0.763335	0.801742
Atg10	0.169329	0.0546189	0.102131	0.0975737
Atg101	0.28521	0.388066	0.339355	0.235522
Atg12	1.13893	0.530271	0.546239	0.539978
Atg13	0.317149	0.239587	0.175046	0.260146
Atg14	0.196404	0.232394	0.208404	0.253029
Atg16l1	0.127183	0.152625	0.180504	0.108421
Atg16l2	0.138575	0.011017	0.0461254	0.0571729
Atg2a	0.0862791	0.147202	0.0710364	0.0481523
Atg2b	0.0539626	0.127203	0.13139	0.143133
Atg3	0.90813	0.549376	0.414928	0.401625
Atg4a	0.144407	0.0680584	0.105941	0.0501724
Atg4b	0.102506	0.151243	0.161276	0.146282
Atg4c	0.347075	0.108642	0.328307	0.15969
Atg4d	0.242137	0.336628	0.233713	0.133172
Atg5	0.373535	0.338964	0.220691	0.207009
Atg7	0.0385009	0.0996184	0.0907025	0.0804223
Atg9a	0.250513	0.150458	0.0967927	0.0459842
Atg9b	0	0	0.0736013	0.0315004
Atic	0.0759004	0.105136	0.221719	0.132094
Atl1	0.0346247	0.0247972	0.0679754	0.10194
Atl2	0.193672	0.308748	0.0684304	0.171711
Atl3	0.252377	0.122392	0.17875	0.0787174
Atm	0.122518	0.225473	0.151469	0.153846
Atmin	0.220893	0.236035	0.341869	0.329917
Atn1	0.338394	0.489339	0.42061	0.373105
Atoh1	0	0	0.0121933	0.469449
Atoh8	0.0414192	0	0.00521538	0.0270414
Atox1	1.87912	0.870926	0.914695	1.01311
Atp10a	0	0.00695301	0.00484715	0.0115288
Atp10b	0.0636546	0	0	0
Atp11a	1.79071	1.94353	1.56406	1.24776
Atp11b	0.44166	0.213547	0.229612	0.168854
Atp11c	0.0439966	0.0168149	0	0.012489
Atp13a1	0.182264	0.65692	0.304001	0.153849
Atp13a2	0.629918	0.438853	0.588454	0.531792
Atp13a3	0.477359	1.06241	0.0991882	0.143116
Atp13a4	0	0	0	0
Atp13a5	0.0803687	0	0	0
Atp1a1	1.68706	1.45826	3.02398	2.57816
Atp1a2	0.571258	0.33643	1.1075	0.975191
Atp1a3	0.0228018	0.033001	0.019098	0.0179708
Atp1a4	0	0	0	0
Atp1b1	1.93276	0.507662	2.35869	2.11689
Atp1b2	0.384973	0.910684	0.199344	0.454992
Atp1b3	0.527737	0.397528	0.305114	0.514624
Atp23	0.0636578	0.0426782	0.0692998	0.049254
Atp2a1	0	0	0	0
Atp2a2	0.821334	0.892621	1.49636	1.37007
Atp2a3	2.24548	0.0584951	0.106905	0
Atp2b1	2.12842	1.31343	0.90591	1.76815
Atp2b2	0.340552	2.19075	2.90225	1.50437
Atp2b3	0	0.00705427	0.0488661	0.0848662
Atp2b4	0.0253805	0.056804	0.43433	0.144649
Atp2c1	0.392811	0.237351	0.607803	0.443333
Atp2c2	0	0.082014	0.00850574	0.0113554
Atp5a1	1.641	1.56774	1.30886	1.39189
Atp5b	1.48193	1.89617	1.60295	1.60651
Atp5c1	1.40549	1.6179	1.29719	1.26462
Atp5d	1.54569	1.49805	1.37307	1.28124
Atp5e	2.42634	2.46228	2.19405	1.91355
Atp5f1	1.61636	1.73607	1.54265	1.41427
Atp5g1	2.02189	1.67276	1.79244	1.6657
Atp5g2	1.982	1.87547	2.05845	1.9082
Atp5g3	1.52833	1.5897	1.4025	1.3231
Atp5h	2.23711	2.22546	2.20168	2.0009
Atp5j	2.35486	2.3838	2.80155	2.4069
Atp5j2	2.06379	2.27189	2.01616	1.84285
Atp5k	1.77665	1.94674	1.76146	1.61318
Atp5l	2.26899	2.06192	1.96772	1.72755
Atp5md	1.87609	2.02576	1.63227	1.46347
Atp5mpl	1.63077	2.03936	2.57593	1.75978
Atp5o	1.19134	1.30824	1.45846	1.1735
Atp6ap1	1.07297	0.797909	0.67937	0.632992
Atp6ap1l	0	0	0	0
Atp6ap2	0.790357	0.668927	0.893949	0.84615
Atp6v0a1	1.13632	1.10273	1.6745	1.29719
Atp6v0a2	0.331402	0.262576	0.216693	0.126573
Atp6v0a4	0	0	0.00489439	0
Atp6v0b	1.76241	1.87574	1.91971	1.69633
Atp6v0c	2.07128	1.57672	1.85291	1.80681
Atp6v0d1	0.567213	0.706736	0.602148	0.533432
Atp6v0d2	0	0	0	0
Atp6v0e	2.63103	2.2642	1.63772	1.82195
Atp6v0e2	0.418039	0.203029	0.367243	0.334669
Atp6v1a	1.41553	1.27995	1.26026	1.32536
Atp6v1b2	0.878835	1.02226	0.777876	0.561603
Atp6v1c1	0.580116	0.466412	0.637551	0.556168
Atp6v1c2	0.191678	0.528936	0.0920029	0.0249965
Atp6v1d	1.13364	0.753839	1.02426	0.815598
Atp6v1e1	1.23193	1.12831	1.21888	1.18187
Atp6v1f	2.06257	2.12475	1.30034	1.2838
Atp6v1g1	2.44915	2.10289	2.45611	2.59966
Atp6v1g2	0.0162622	0.0211097	0.0416626	0.0152739
Atp6v1h	0.418551	0.368996	0.367841	0.301038
Atp7a	0.252764	0.0780045	0.0753482	0.0696294
Atp7b	0.0381503	0	0.0113641	0
Atp8a1	0.17814	1.23347	1.03461	0.376227
Atp8a2	0.182796	1.36105	0.696156	1.23922
Atp8b1	0.0194663	1.02328	0.357068	0.216707
Atp8b2	0	0.011519	0.0911604	0.0482913
Atp8b4	0	0	0.0614785	0.0443789
Atp8b5	0.0888358	0	0.0505237	0.0398833
Atp9a	0.644719	0.639876	0.705022	0.828972
Atp9b	0.393769	0.423602	0.319536	0.383133
Atpaf1	0.269994	0.199759	0.314905	0.245921
Atpaf2	0.279476	0.354049	0.169342	0.103159
Atpif1	1.63666	1.41554	2.1447	1.94905
Atpsckmt	0.0765819	0.156338	0.222544	0.25173
Atr	0.173739	0.0844224	0.0735401	0.136453
Atraid	0.524981	0.461653	0.616799	0.583445
Atrip	0.212064	0.154833	0.232296	0.237933
Atrn	0.613594	0.448117	0.251663	0.200321
Atrnl1	0.149619	0.212736	0.14889	0.267952
Atrx	1.29027	1.44002	1.42699	1.23453
Atxn1	0.600305	0.652156	0.580532	0.547671
Atxn10	0.548282	0.383347	0.49575	0.555676
Atxn1l	0.207467	0.139302	0.123188	0.0743993
Atxn2	0.630212	0.523885	0.43194	0.458589
Atxn2l	0.621648	0.41984	0.451573	0.406871
Atxn3	0.122868	0.118188	0.10489	0.19068
Atxn7	0.3523	0.470807	0.222618	0.136571
Atxn7l1	0.136406	0.0577848	0.171433	0.0644838
Atxn7l2	0.0229831	0.0590232	0.152476	0.0677876
Atxn7l3	0.404564	0.337568	0.202978	0.265485
Atxn7l3b	1.83568	1.83844	2.19455	2.13077
AU019990	0	0.00368421	0	0
AU020206	0.0569231	0.00211078	0.00651209	0.117359
AU021092	0.0138633	0	0	0
AU022252	0.193948	0.327545	0.232706	0.223052
AU022754	0.01305	0	0	0
AU040320	0.282323	0.216903	0.168355	0.308794
AU041133	0.302817	0.232792	0.270268	0.389426
Auh	0.283642	0.222883	0.198927	0.242489
Aunip	0	0	0	0
Aup1	0.329829	0.361869	0.268198	0.349878
Aurka	0	0	0	0
Aurkaip1	0.97053	0.864416	0.927097	0.89075
Aurkb	0	0.00842595	0.00596201	0
Auts2	1.24432	1.39591	0.778822	0.682042
AV039307	0.00910097	0.0298298	0.024347	0.052675
AV099323	0.0654707	0.0527251	0.0380047	0.0993006
AV356131	0.167157	0.610353	0.44013	0.489685
Aven	0.192062	0.23194	0.0819688	0.282075
Avil	0.0271349	0	0.00567149	0.016359
Avl9	0.447396	0.554333	0.284147	0.393077
Avpi1	0.108376	0.0232177	0.0774571	0.156182
AW011738	0	0	0.167857	0.034724
AW046200	0	0.00761991	0	0
AW047730	0	0	0	0
AW112010	0	0	0	0
AW146154	0.14161	0.119109	0.0967671	0.0883566
AW209491	0.318923	0.230613	0.319603	0.348495
AW495222	0	0.00463069	0.00520149	0
AW549877	0.49922	0.295205	0.352385	0.390039
AW551984	0	0	0	0
AW554918	0.102804	0.119724	0.217219	0.20776
Axin1	0.151829	0.175653	0.154092	0.161529
Axin2	0.202212	0.0131602	0.241151	0.151588
Axl	0	0.0032567	0.00507825	0
AY036118	1.72275	2.61143	2.44692	2.09564
Azi2	0.45595	0.619986	0.525219	0.507763
Azin1	0.37828	0.640761	0.549197	0.636422
Azin2	0.177354	0.161125	0.164467	0.0450963
B020010K11Rik	0.0462279	0.045888	0.043345	0.0517244
B130024G19Rik	0	0.048894	0	0
B130034C11Rik	0.00959822	0.0365099	0.0616871	0.122791
B130046B21Rik	0	0	0	0
B130055M24Rik	0.0100418	0.0165243	0.0125284	0.0123983
B230118H07Rik	0.197439	0.20533	0.689944	0.678327
B230206H07Rik	0	0.0522301	0.00338706	0.0116134
B230206L02Rik	0.0434669	0.208557	0.0859159	0.389581
B230208H11Rik	0	0.0102465	0.0303192	0
B230216N24Rik	0	0	0.00999238	0
B230217C12Rik	0.0223345	0.0541736	0.0766993	0.0791244
B230217O12Rik	0	0	0.009937	0.0126792
B230219D22Rik	1.38039	1.8859	1.7539	1.88813
B230303O12Rik	0	0	0	0.0124626
B230307C23Rik	0.119629	0.275388	0.24183	0.238509
B230311B06Rik	0	0	0	0
B230312C02Rik	0	0.00403901	0.00443942	0
B230317F23Rik	0.0542989	0.0272853	0.0171906	0.0124626
B230319C09Rik	0.078738	0.00744814	0.0103258	0.0126298
B230322F03Rik	0.12236	0.0400332	0.0395641	0.100424
B230334C09Rik	0	0	0.00713613	0
B230354K17Rik	0.204062	0.238761	0.161828	0.239566
B230369F24Rik	0.0668682	0.0275196	0.0953839	0.130269
B230398E01Rik	0.0109324	0.0104856	0.0242993	0
B2m	0.186584	0.099389	0.170035	0.417553
B3galnt1	0	0	0.0662149	0.181111
B3galnt2	0.271331	0.135819	0.172626	0.107967
B3galt1	0.0967409	0	0.0257614	0.0734999
B3galt2	0	0.0146565	0	0
B3galt4	0.0477342	0.0713668	0.0685374	0.0714309
B3galt5	0	0.634995	0.14871	0.0220842
B3galt6	0.149359	0.212426	0.237812	0.262492
B3gat1	0	0.00378545	0	0
B3gat2	0.0131505	0.0143837	0.0127938	0.0222228
B3gat3	0.6135	0.714591	0.504947	0.580752
B3glct	0.211714	0.0364793	0.355052	0.218507
B3gnt2	0.26752	0.445318	0.466096	0.542154
B3gnt3	0	0	0	0
B3gnt4	0.0813339	0.0722701	0.305602	0.433505
B3gnt5	0	0	0	0
B3gnt7	0	0	0	0.0104106
B3gnt8	0	0.00640436	0	0.0101044
B3gnt9	0	0.0105428	0	0
B3gntl1	0.0566673	0.00247588	0.0259562	0.0350758
B430010I23Rik	0.0475101	0.0143788	0.010105	0.0420226
B430218F22Rik	0	0	0.00474635	0
B430219N15Rik	0.0189177	0.0176003	0	0
B430306N03Rik	0.0467499	0	0.00473739	0
B4galnt1	0.0575918	0.0116079	0	0.0109828
B4galnt3	0.0289584	0.00428572	0.0847641	0.0464558
B4galnt4	0.166539	0.186924	0.0519163	0.20776
B4galt1	0.0509323	0.115943	0.105335	0.0575934
B4galt2	0.0363292	0.0908187	0.165332	0.0895743
B4galt3	0.199876	0.147059	0.156355	0.260676
B4galt4	0.673403	0.86946	0.248425	0.349859
B4galt5	0.162494	0.101452	0.259782	0.505146
B4galt6	0.127651	0.00752504	0.0130009	0.0268638
B4galt7	0.0708398	0.0674527	0.0534973	0.0455151
B4gat1	0.211634	0.2604	0.343921	0.357989
B630019K06Rik	0	0.00394043	0	0
B830012L14Rik	0	0	0	0
B930036N10Rik	0.0639029	0.0450507	0.0635706	0
B930059L03Rik	0.0207465	0.0314815	0.0109852	0
B930094E09Rik	0	0	0	0
B930095G15Rik	0.107993	0.0526149	0.0376805	0.100312
B9d1	0.0974022	0.106914	0.38511	0.392969
B9d2	0.126768	0.182586	0.502847	0.433195
Baalc	0	0	0	0.038715
Babam1	0.344163	0.320482	0.415832	0.424155
Babam2	0.397902	0.264776	0.350554	0.335242
Bace1	0.207279	0.192296	0.488069	0.784056
Bace2	0.108197	0.0376021	0	0
Bach1	0.0511617	0.124651	0.083278	0.0903521
Bach2	0.0187971	0.271524	0.019328	0.185666
Bach2it1	0	0	0	0
Bad	0.529758	0.352058	0.527485	0.590874
Bag1	1.14774	0.932783	0.867142	0.736614
Bag2	0.358005	0.588709	0.97813	0.536062
Bag3	0.0537938	0.0337993	0.0620793	0.0551285
Bag4	0.20406	0.173742	0.188417	0.151886
Bag5	0.444237	0.789078	0.472828	0.492248
Bag6	0.652345	0.630722	0.473622	0.549013
Bahcc1	0.0276946	0.0763513	0.0955381	0.0767856
Bahd1	0.0376979	0.10461	0.0205537	0.120853
Baiap2	0.0226439	0.00550101	0.0131376	0.0142264
Baiap2l1	0.45069	0.109987	0.12061	0.10446
[truncated: 15,475 more rows]
